# Supplementary material
Source: PubMed Central journal article supplement (PMC6487310)
Supplement: NIHMS889787-supplement-Supplement1.pdf [file NIHMS889787-supplement-Supplement1.pdf]

## Supplementary Appendix

This appendix has been provided by the authors to give readers additional information about their work.

Supplement to: Carbone DP, Reck M, Paz-Ares L, et al. First-line nivolumab in stage IV or recurrent non-small-cell lung cancer. *N Engl J Med* 2017;376:2415-26. DOI: 10.1056/NEJMoa1613493

## **Supplementary Appendix**

### **First-line Nivolumab in Stage IV or Recurrent Non-Small-Cell Lung Cancer**

## Table of Contents

|                                                                                                                                     |    |
|-------------------------------------------------------------------------------------------------------------------------------------|----|
| List of Investigators .....                                                                                                         | 4  |
| Supplemental Text .....                                                                                                             | 8  |
| Figure S1A. Consolidated Standards of Reporting Trials (CONSORT) Diagram of Patient Disposition. ....                               | 10 |
| Figure S1B. Study Design.....                                                                                                       | 11 |
| Figure S2. Kaplan–Meier Plot of Progression-free Survival in All Randomized Patients. ....                                          | 13 |
| Figure S3. Kaplan–Meier Plot of Overall Survival in All Randomized Patients. ....                                                   | 14 |
| Figure S4A. Progression-free Survival in Subgroups of Patients with $\geq 5\%$ PD-L1 Expression. 15                                 |    |
| Figure S4B. Overall Survival in Subgroups of Patients with $\geq 5\%$ PD-L1 Expression. ....                                        | 16 |
| Figure S5. Total Exome Mutations Versus Genes in FoundationOne Panel <sup>a</sup> .....                                             | 17 |
| Figure S6. Kaplan–Meier Plot of Progression-free Survival in Patients Evaluable for Tumor Mutation Burden. ....                     | 18 |
| Figure S7. Kaplan–Meier Plot of Overall Survival in Patients Evaluable for Tumor Mutation Burden. ....                              | 19 |
| Figure S8. Kaplan–Meier Plot Overall Survival in Evaluable Patients with High Tumor Mutation Burden. ....                           | 20 |
| Figure S9. Kaplan–Meier Plot of Overall Survival in Evaluable Patients with Low or Medium Tumor Mutation Burden. ....               | 21 |
| Figure S10. Kaplan–Meier Plot of Progression-free Survival by Tumor Mutation Burden (TMB) Tertile in the Nivolumab Arm.....         | 22 |
| Figure S11. Kaplan–Meier Plot of Progression-free Survival by Tumor Mutation Burden (TMB) Tertile in the Chemotherapy Arm. ....     | 23 |
| Figure S12. Overall Response by Tumor Mutation Burden. ....                                                                         | 24 |
| Figure S13. Analysis of the Association Between Tumor Mutation Burden and PD-L1 Expression <sup>a</sup> in Evaluable Patients. .... | 25 |
| Figure S14. Overall Response by Tumor Mutation Burden and PD-L1 Expression.....                                                     | 26 |
| Table S1. End-of-Treatment Summary (All Treated Patients). ....                                                                     | 27 |
| Table S2. Baseline Characteristics of All Randomized Patients. ....                                                                 | 28 |
| Table S3. Baseline Characteristics of Patients with $\geq 5\%$ PD-L1 Expression. ....                                               | 30 |
| Table S4. Chemotherapy Study Treatments (All Treated Patients).....                                                                 | 32 |
| Table S5. Subsequent Systemic Therapy in Patients with $\geq 5\%$ PD-L1 Expression.....                                             | 33 |
| Table S6. Sample Attrition During Tumor Mutation Burden Determination.....                                                          | 34 |

|                                                                                                                            |    |
|----------------------------------------------------------------------------------------------------------------------------|----|
| Table S7. Baseline Characteristics of All Randomized Patients and Patients with Evaluable Tumor Mutation Data. ....        | 35 |
| Table S8. Baseline Characteristics of Patients with Evaluable Tumor Mutation Data by Treatment Arm. ....                   | 37 |
| Table S9. Treatment-Related Adverse Events in $\geq 5\%$ of Patients Treated with Nivolumab or Chemotherapy. ....          | 39 |
| Table S10. Treatment-Related Serious Adverse Events in $\geq 2\%$ of Patients Treated with Nivolumab or Chemotherapy. .... | 41 |
| Table S11. Treatment-Related Adverse Events Leading to Discontinuation of Nivolumab. ....                                  | 42 |
| Table S12. Treatment-Related Adverse Events Leading to Discontinuation of Chemotherapy ..                                  | 44 |
| Table S13. Treatment-Related Select Adverse Events <sup>a</sup> in Patients Treated with Nivolumab or Chemotherapy. ....   | 46 |
| References .....                                                                                                           | 47 |

## List of Investigators

**Argentina:** Lorena Lupinacci (Hospital Italiano De Buenos Aires), Claudio Martin (Instituto Medico Especializado Alexander Fleming), Norma Pilnik (Clinica Colombo), Martin Eduardo Richardet (Instituto Oncologico De Cordoba), Mirta Susana Varela (COIBA); **Australia:** Jacqueline Adams (Lyell McEwin Hospital), Michael Boyer (Chris O'Brien Lifehouse), Thomas John (Austin Hospital), Melissa Moore (St Vincent's Hospital), Kenneth O'Byrne (Princess Alexandra Hospital); **Austria:** Josef Eckmayr (Klinikum Wels-Grieskirchen Gmbh), Robert Pirker (University of Vienna); **Belgium:** Lore Decoster (Universitair Ziekenhuis Brussel), Jan van Meerbeeck (Antwerp University Hospital), Johan Vansteenkiste (Uz Leuven), Veerle Surmont (Uz Gent); **Brazil:** Carlos Henrique Barrios (Hospital São Lucas da PUCRS), Fabio Andre Franke (Associação Hospital De Caridade De Ijuí), Gustavo Pinto (Hospital de Câncer de Barretos- Fundação Pio XII); **Canada:** Normand Blais (Chum-Hopital Notre-Dame), Marie-Claude Foley (CISSS du Bas-Saint-Laurent – Hopital Regional de Rimouski), Rosalyn Juergens (Juravinski Cancer Centre, Hamilton, Ontario), Natasha Leighl (Princess Margaret Cancer Centre), Don G Morris (Tom Baker Cancer Centre); **Czech Republic:** Libor Havel (Klinika pneumologie a hrudní chirurgie, Nemocnice Na Bulovce) Vitezslav Kolek (Klinika Plicnich Nemoci a Tuberkulozy), Jana Krejci (Klinika pneumologie a hrudní chirurgie, Nemocnice Na Bulovce), Pavel Reiterer (Plicni Oddeleni), Jaromir Roubec (Klinika Tuberkulozy a Respiracnich Nemoci); **Finland:** Jarkko Ahvonen (Tampere University Hospital), Antti Jekunen (Vaasa Central Hospital), Paula Maasilta (Helsinki University Hospital); **France:** Fabrice Barlesi (Hôpital Nord de Marseille), Eric Dansen (Centre Oscar Lambret, Lille), Gislaine Fraboulet (Centre Hospitalier René Dubos), Herve Lena (Hôpital Pontchaillou – Centre Hospitalier Universitaire de Rennes), Bertrand Mennequier (Nouvel Hôpital Civil, Strasbourg), Gerard

Zalcman (Hôpital Côte de Nacre – Centre Hospitalier de Caen); **Germany:** Norbert Frickhofen (HELIOS Dr. Horst-Schmidt-Kliniken Wiesbaden), Martin Kohlhaeufl (Klinik Schillerhöhe), Martin Reck (LungenClinic Grosshansdorf, Airway Research Center North [ARCN], German Center for Lung Research [DZL]), Roland Repp (Sozialstiftung Bamberg), Martin Steins (Thoraxklinik, Heidelberg University Hospital), Juergen Wolf (Universitaetsklinik Koeln); **Greece:** Sofia Agelaki (University Hospital of Heraklion), Konstantinos Syrigos (Sotiria General Hospital); **Hungary:** Istvan Albert (Matrai Gyogyintezet), Gyula Ostoros (Orsz.Koranyi Tbc es Pulm.Int.), Maria Szilasi (Tudogyogyaszati Klinika); **Italy:** Federico Cappuzzo (Ospedale Civile Di Livorno), Lucio Crino (Ospedale S. Maria Della Misericordia), Filippo De Marinis (Istituto Europeo Di Oncologia), Cesare Gridelli (Azienda Ospedaliera Moscati), Alessandro Morabito (Istituto Nazionale Tumori Fondazione Pascale), Fausto Roila (Ospedale S.Maria); **Japan:** Shinji Atagi (National Hospital Organization), Shiro Fujita (Institute of Biomedical Research and Innovation Hospital), Toyoaki Hida (Aichi Cancer Center Central Hospital), Tomonori Hirashima (Osaka Prefectural MC for Respiratory and Allergic Diseases), Makoto Maemondo (Miyagi Cancer Center), Koichi Minato (Gunma Prefectural Cancer Center), Kazuhiko Nakagawa (Kinki University Hospital), Makoto Nishio (Cancer Institute Hospital of JFCR), Naoyuki Nogami (Shikoku Cancer Center), Yuichiro Ohe (National Cancer Center Hospital), Hideo Saka (Nagoya Medical Center), Hiroshi Sakai (Saitama Cancer Center), Miyako Satouchi (Hyogo Cancer Center), Koji Takeda (Osaka City General Hospital), Hiroshi Tanaka (Niigata Cancer Center Hospital), Nobuyuki Yamamoto (Wakayama Medical University Hospital); **Mexico:** Oscar Arrieta-Rodriguez (Instituto Nacional De Cancerologia), Emanuel De la Mora Jimenez (Instituto Jalisciense De Cancerologia), Victoria Flores Wilbert (Centro de Estudios Clinicos Especializados); **Netherlands:** Joachim Aerts (Erasmus MC University Hospital), T

Jeroen N Hiltermann (University of Groningen, Universitair Medisch Centrum Groningen), Michel Van Den Heuvel (Antoni van Leeuwenhoek Ziekenhuis); **Poland:** Ewa Chmielowska (Oddzial Kliniczny Onkologii), Grzegorz Czyzewicz (Oddzial Onkologiczny), Jacek Gabrys (Oddzial III Pulmonologii i Rehabilitacji Oddechowej), Ewa Kalinka-Warzocho (Regionalny Osrodek Onkologiczny), Adam Pluzanski (Klinika Nowotworow Pluca i Klatki Piersiowej); **Republic of Korea:** Hye Ryun Kim (Severance Hospital), Sang-We Kim (Asan Medical Center), Keunchil Park (Samsung Medical Center); **Romania:** Calin Cainap (Bendis Clinic SRL), Tudor-Eliade Ciuleanu (Prof. Dr. Ion Chiricuta Institute of Oncology and UMF Iuliu Hatieganu, Cluj-Napoca), Doru Ghizdavescu (Spitalul Municipal Ploiesti); **Spain:** Ana Blasco (Hospital General Univ De Valencia), Jesus Corral Jaime (Hospital Universitario Virgen Del Rocio), Javier De Castro (Hospital De Madrid, Norte Sanchinarro), Enriqueta Felip (Vall d'Hebron University Hospital), Luis Paz-Ares (Hospital Universitario Doce de Octubre, CNIO and Universidad Complutense, Madrid), Delvys Rodriguez Abreu (Complejo Hospitalario Universitario Insular de Gran Canaria), Jose Trigo (Hospital Clinico Universitario Virgen De La Victoria); **Sweden:** Karl-Gustav Kölbeck (Karolinska University Hospital), Magnus Lindskog (Akademiska Hospital); **Switzerland:** Alessandra Curioni-Fontecedro (Klinik für Onkologie, UniversitätsSpital Zürich), Michael Mark (Kantonsspital Graubünden), Solange Peters (Oncology Department, Lausanne University Hospital); **Taiwan:** Yuh-Min Chen (Taipei Veterans General Hospital); **Turkey:** Halit Karaca (Erciyes Universitesi Tip Fakultesi); **United Kingdom:** David Chao (North Middlesex University Hospital), Clive Mulatero (St James's University Hospital), Yvonne Summers (Christie Hospital NHS Trust); **United States:** Sherri Arledge (Southern Cancer Center, Inc.), Firas Badin (Baptist Health Lexington), Marta Batus (Rush University Medical Center), George Blumenschein (The University of Texas MD

Anderson Cancer Center), Hossein Borghaei (Fox Chase Cancer Center), Ross Camidge (University of Colorado Hospital), Thomas Boyd (Yakima Valley Memorial Hospital – North Star Lodge), Julie Brahmer (Sidney Kimmel Comprehensive Cancer Center At Johns Hopkins), David Carbone (Ohio State University Comprehensive Cancer Center), Jeremy Cetnar (Oregon Health & Science University), Abraham Chachoua (New York University Clinical Cancer Center), Jamie Chaft (Memorial Sloan Kettering Cancer Center), Hongbin Chen (Roswell Park Cancer Institute), Benjamin Creelan (H. Lee Moffitt Cancer Center), Justin Gainor (Massachusetts General Hospital), Scott Gettinger (Yale University), David E. Gerber (University of Texas Southwestern Medical Center), Leora Horn (Vanderbilt University Medical Center), Paul Kaywin (Advanced Medical Specialties), Robert Kessler (Crescent City Research Consortium, LLC), Corey J. Langer (University of Pennsylvania), Joseph McCracken (Cancer Care Centers of South Texas), Suresh Nair (Lehigh Valley Health Network), Raul Oyola (Northwest Georgia Oncology Center, PC), Rathi Pillai (Emory University – Winship Cancer Institute), Fahd Quddus (St Francis Hospital), Deepa Rangachari (Beth Israel Deaconess Medical Center), Neal Ready (Duke University), Craig Reynolds (Ocala Oncology Center), Richard Rosenberg (Arizona Oncology Associates), Neelesh Sharma (University Hospitals of Cleveland), Thomas Stinchcombe (University of North Carolina at Chapel Hill), Liza Villaruz (UPMC Cancer Center), Heather Wakelee (Stanford Cancer Institute), John Wrangle (Hollings Cancer Center).



## **Supplemental Text**

### **Analyses of tumor mutation burden**

#### *RNA and DNA isolation*

DNA and RNA was co-isolated from archival tumor tissue using the Allprep DNA/RNA FFPE kit (Qiagen, Hilden, Germany). DNA from whole blood (germline DNA) was isolated using the QIAamp DNA Blood Midi Kit (Qiagen, Hilden, Germany) following the manufacturer's instructions.

#### *Whole exome capture and sequencing*

Genomic DNA (150 ng) was used for library preparation using the Agilent SureSelectXT reagent kit (Agilent Technologies, Santa Clara, USA) with the on-bead modifications of Fisher et al, 2011.<sup>1</sup> A total of 500 ng of enriched library was used in the hybridization and captured with the SureSelect All Exon v5 (Agilent Technologies, Santa Clara, USA) bait. Following hybridization, the captured libraries were purified according to the manufacturer's recommendations and amplified by polymerase chain reaction (11 cycles). Normalized libraries were pooled and DNA was sequenced on the Illumina HiSeq 2500 using 2 x 100-bp paired-end reads; an average of 84 million reads were sequenced per tumor sample (average 84.6 x the mean tumor target coverage), and an average of 89 million reads were sequenced per germline sample (average 93 x the mean germline target coverage).

#### *Tumor mutation burden determination*

Whole exome sequencing data were used to generate tumor mutation burden (total number of missense mutations) for each patient. Missense mutations were identified from paired tumor-

germline whole exome sequencing data using two mutation callers.<sup>2,3</sup> The union of the two callers was used to calculate the tumor mutation burden.

**Figure S1A. Consolidated Standards of Reporting Trials (CONSORT) Diagram of Patient Disposition.**

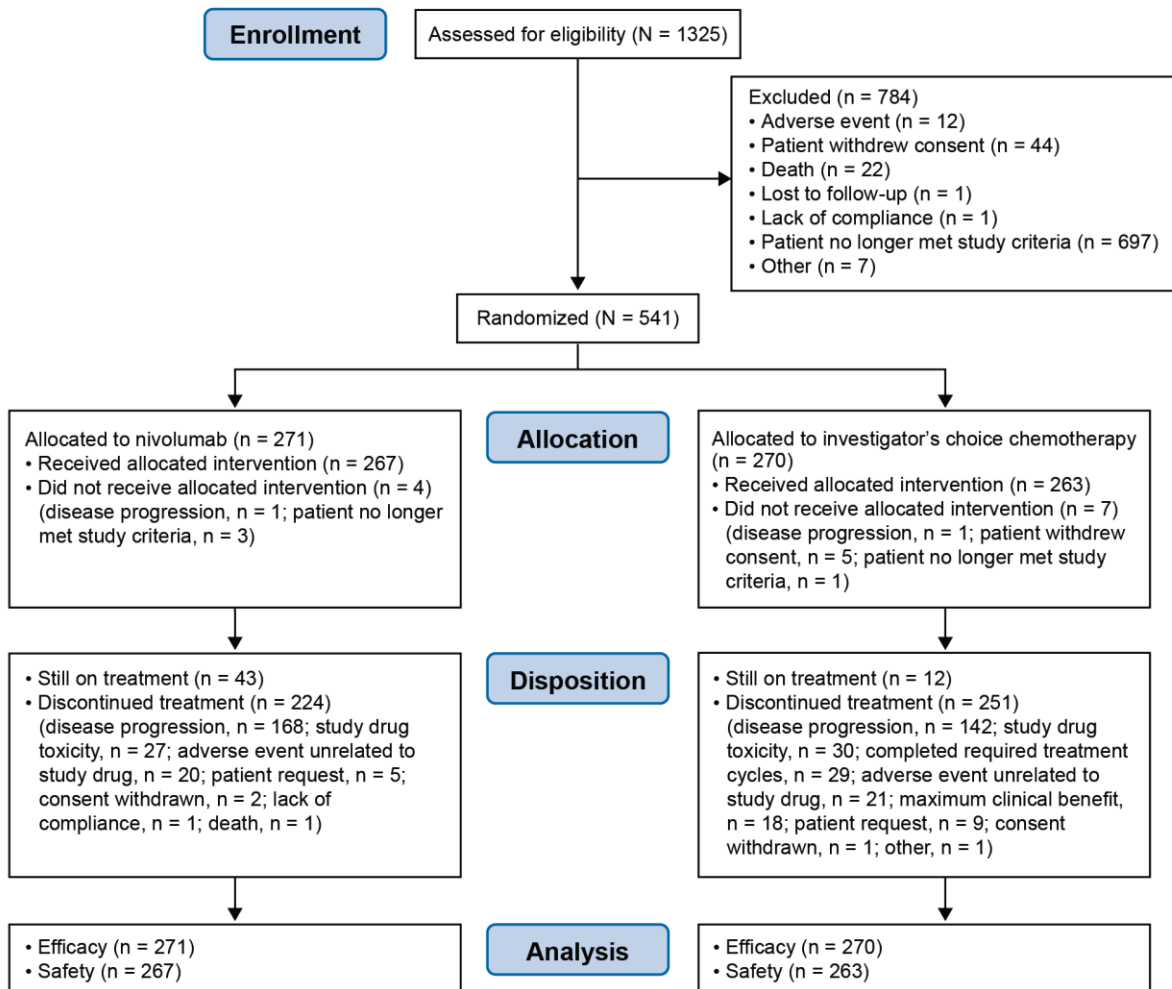

**Figure S1B. Study Design.**

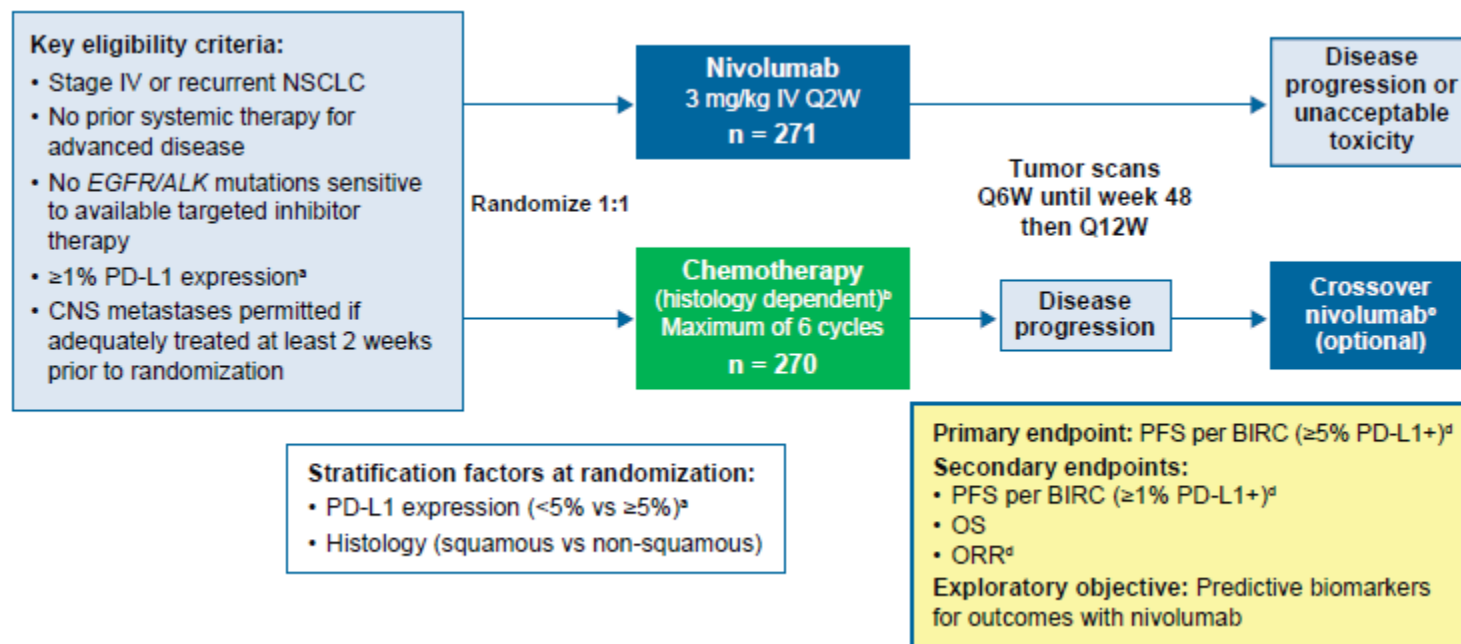

<sup>a</sup>Dako 28-8 validated; archival tumor samples obtained  $\leq 6$  months before enrollment were permitted; PD-L1 testing was centralized.

<sup>b</sup>Squamous: gemcitabine 1250 mg/m<sup>2</sup> + cisplatin 75 mg/m<sup>2</sup>; gemcitabine 1000 mg/m<sup>2</sup> + carboplatin AUC 5; paclitaxel 200 mg/m<sup>2</sup> + carboplatin AUC 6; nonsquamous: pemetrexed 500 mg/m<sup>2</sup> + cisplatin 75 mg/m<sup>2</sup>; pemetrexed 500 mg/m<sup>2</sup> + carboplatin AUC 6; option for pemetrexed maintenance therapy.

<sup>c</sup>Permitted if crossover eligibility criteria met, including progression confirmed by independent radiology review.

<sup>d</sup>Tumor response assessment for PFS and ORR per RECIST v1.1 as determined by independent central review.

*ALK* = anaplastic lymphoma kinase; *CNS* = central nervous system; *EGFR* = epidermal growth factor receptor; *IV* = intravenous; *NSCLC* = non-small cell lung cancer; *OS* = overall survival; *ORR* = objective response rate; *PD-L1* = programmed death-1 ligand 1; *PFS* = progression-free survival; *Q2W* = every 2 weeks; *Q6W* = every 6 weeks; *Q12W* = every 12 weeks; *RECIST* = response evaluation criteria in solid tumors.

**Figure S2. Kaplan–Meier Plot of Progression-free Survival in All Randomized Patients.**

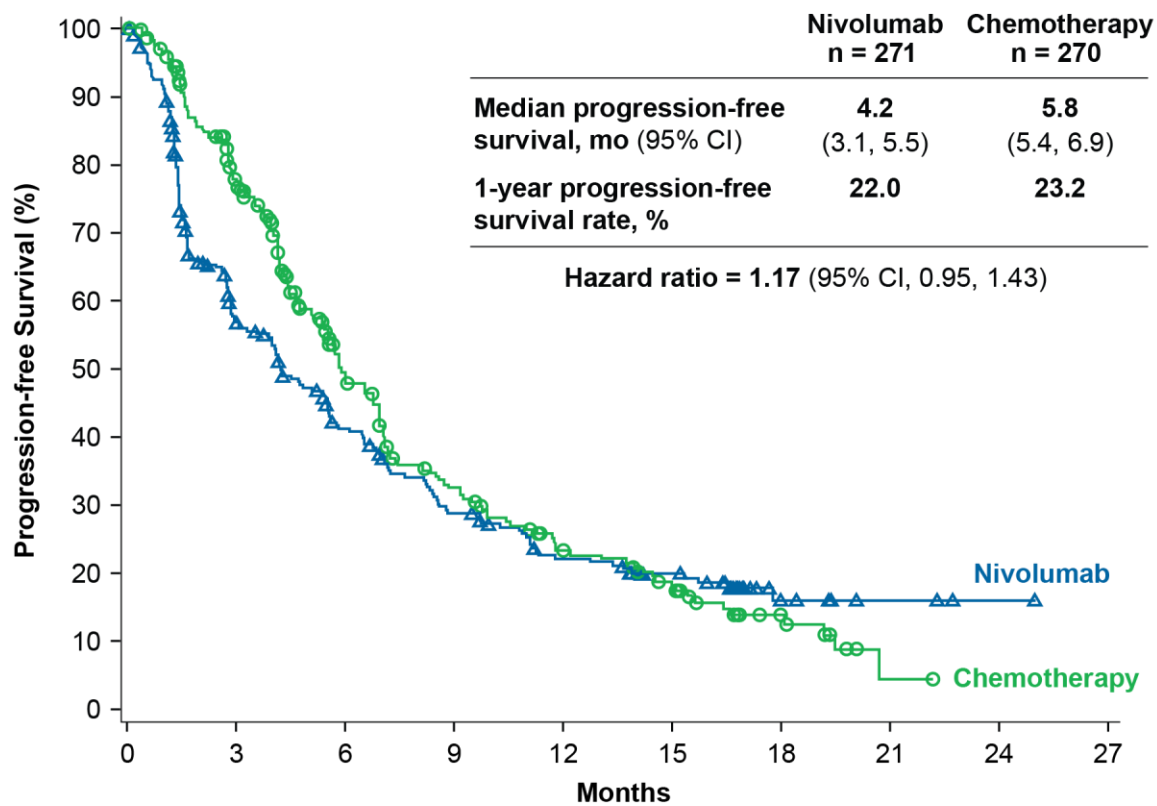

**No. of Patients at Risk**

|                     |     |     |    |    |    |    |    |   |   |   |
|---------------------|-----|-----|----|----|----|----|----|---|---|---|
| <b>Nivolumab</b>    | 271 | 132 | 88 | 59 | 42 | 29 | 8  | 3 | 1 | 0 |
| <b>Chemotherapy</b> | 270 | 185 | 96 | 59 | 37 | 25 | 10 | 1 | 0 | 0 |

**Figure S3. Kaplan–Meier Plot of Overall Survival in All Randomized Patients.**

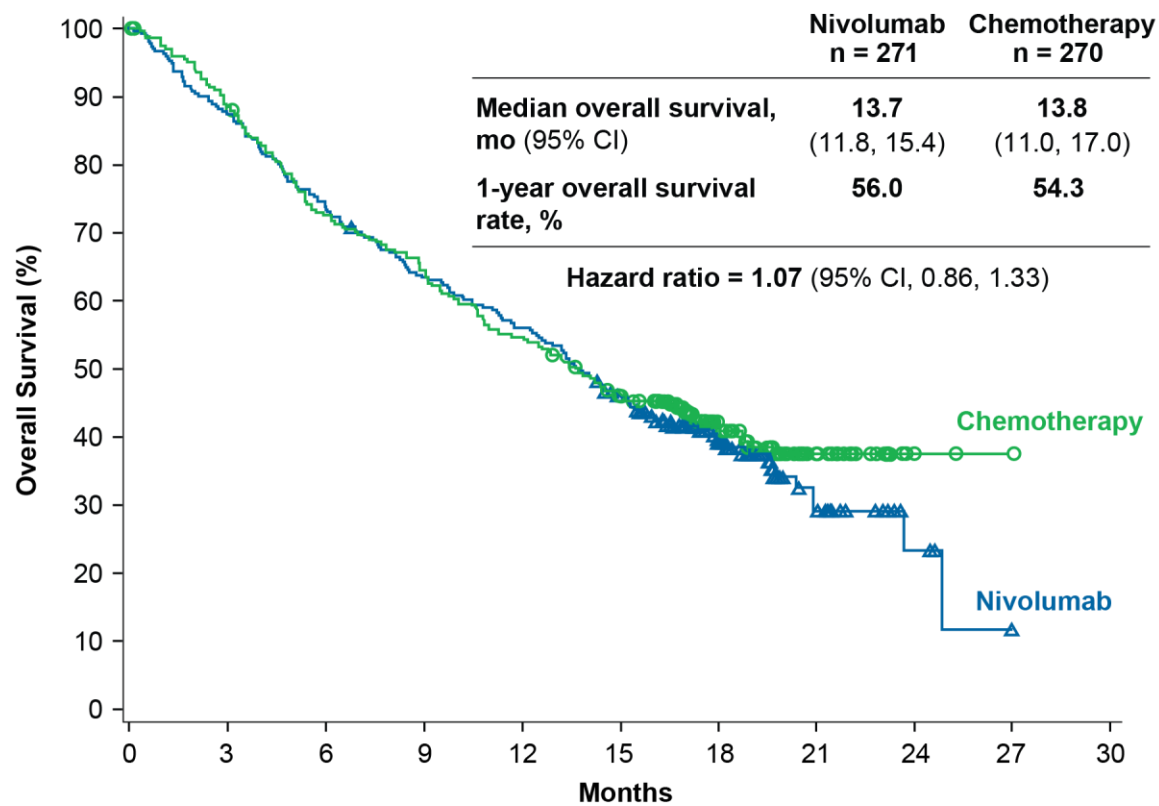

**No. of Patients at Risk**

|                     | 0   | 3   | 6   | 9   | 12  | 15  | 18 | 21 | 24 | 27 | 30 |
|---------------------|-----|-----|-----|-----|-----|-----|----|----|----|----|----|
| <b>Nivolumab</b>    | 271 | 237 | 200 | 171 | 151 | 120 | 62 | 17 | 4  | 0  | 0  |
| <b>Chemotherapy</b> | 270 | 237 | 194 | 173 | 145 | 119 | 61 | 20 | 3  | 1  | 0  |

**Figure S4A. Progression-free Survival in Subgroups of Patients with  $\geq 5\%$  PD-L1 Expression.**

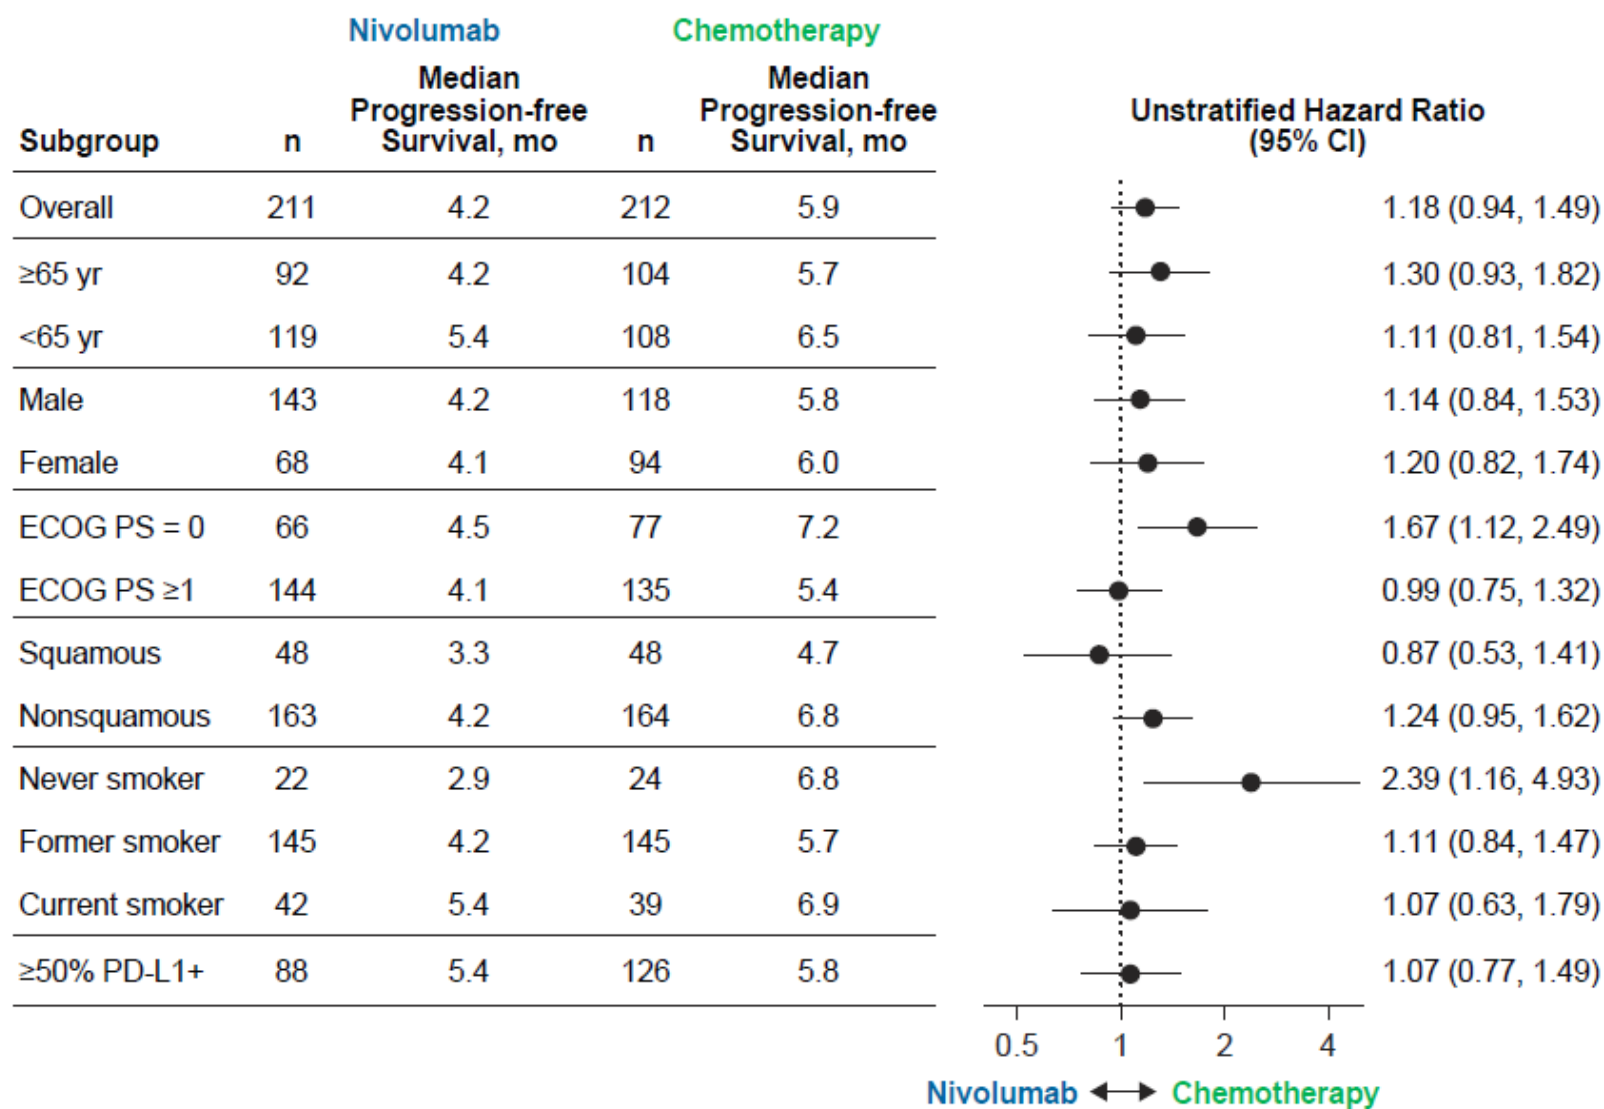



Figure S4B. Overall Survival in Subgroups of Patients with  $\geq 5\%$  PD-L1 Expression.

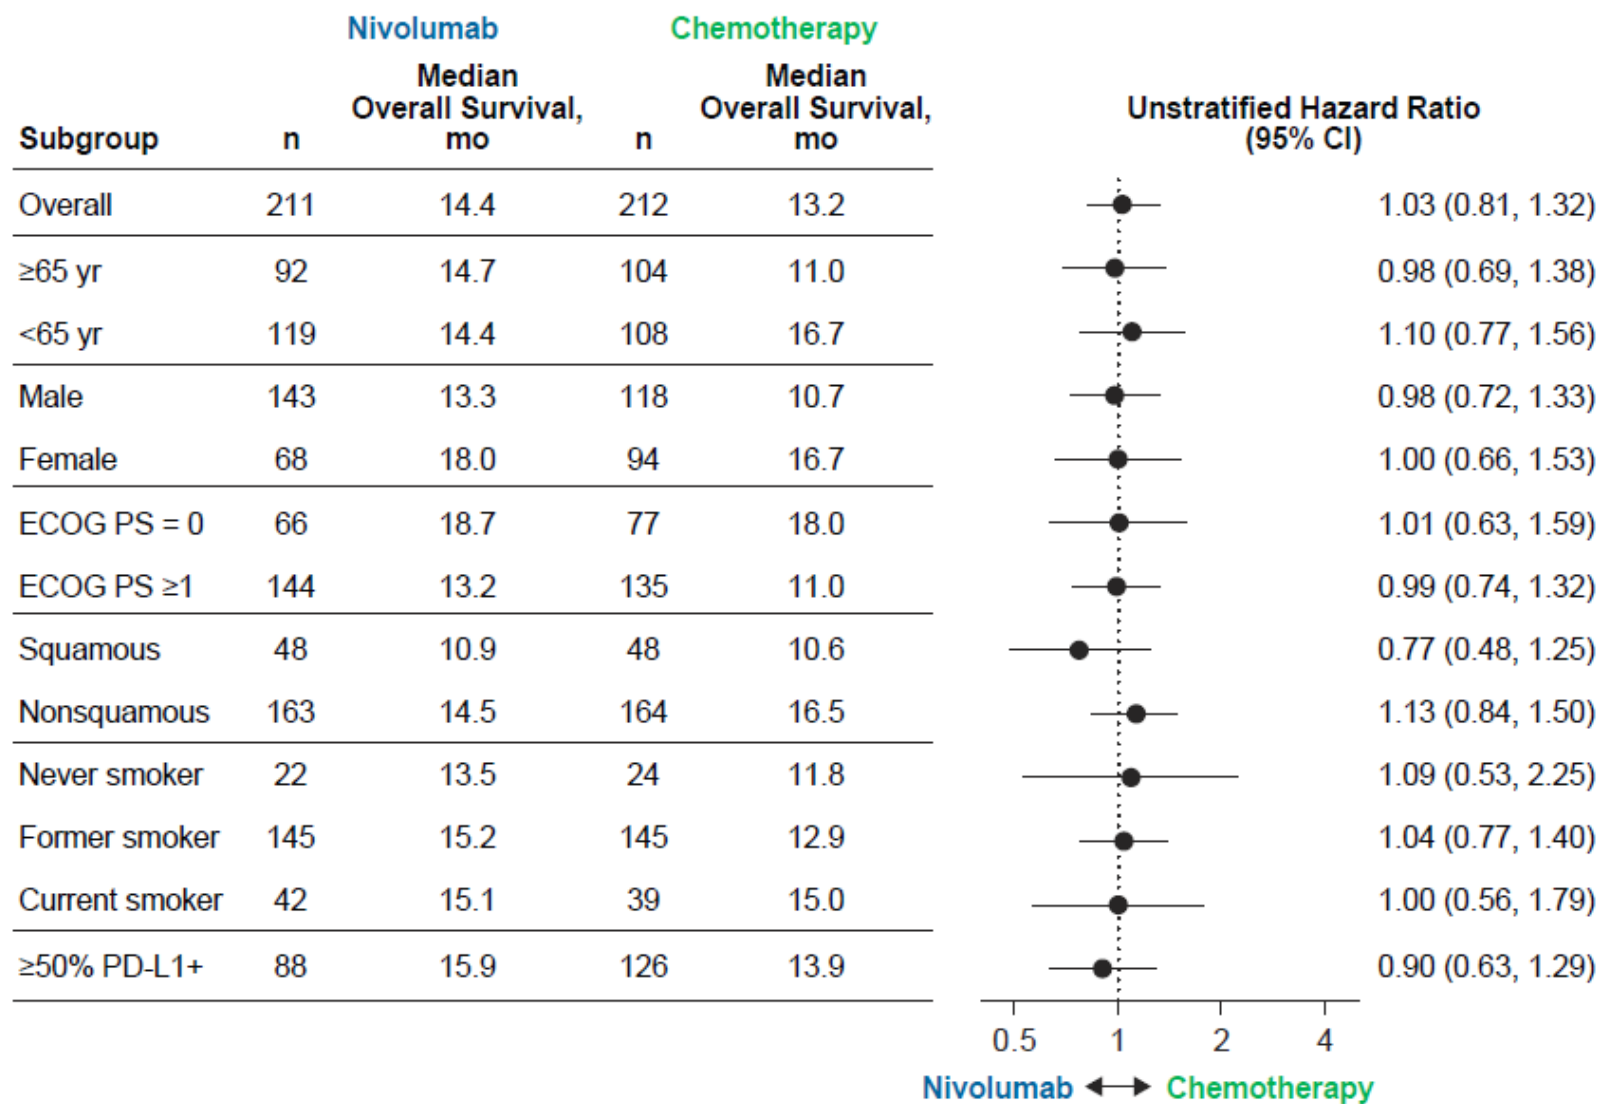

Figure S5. Total Exome Mutations Versus Genes in FoundationOne Panel<sup>a</sup>

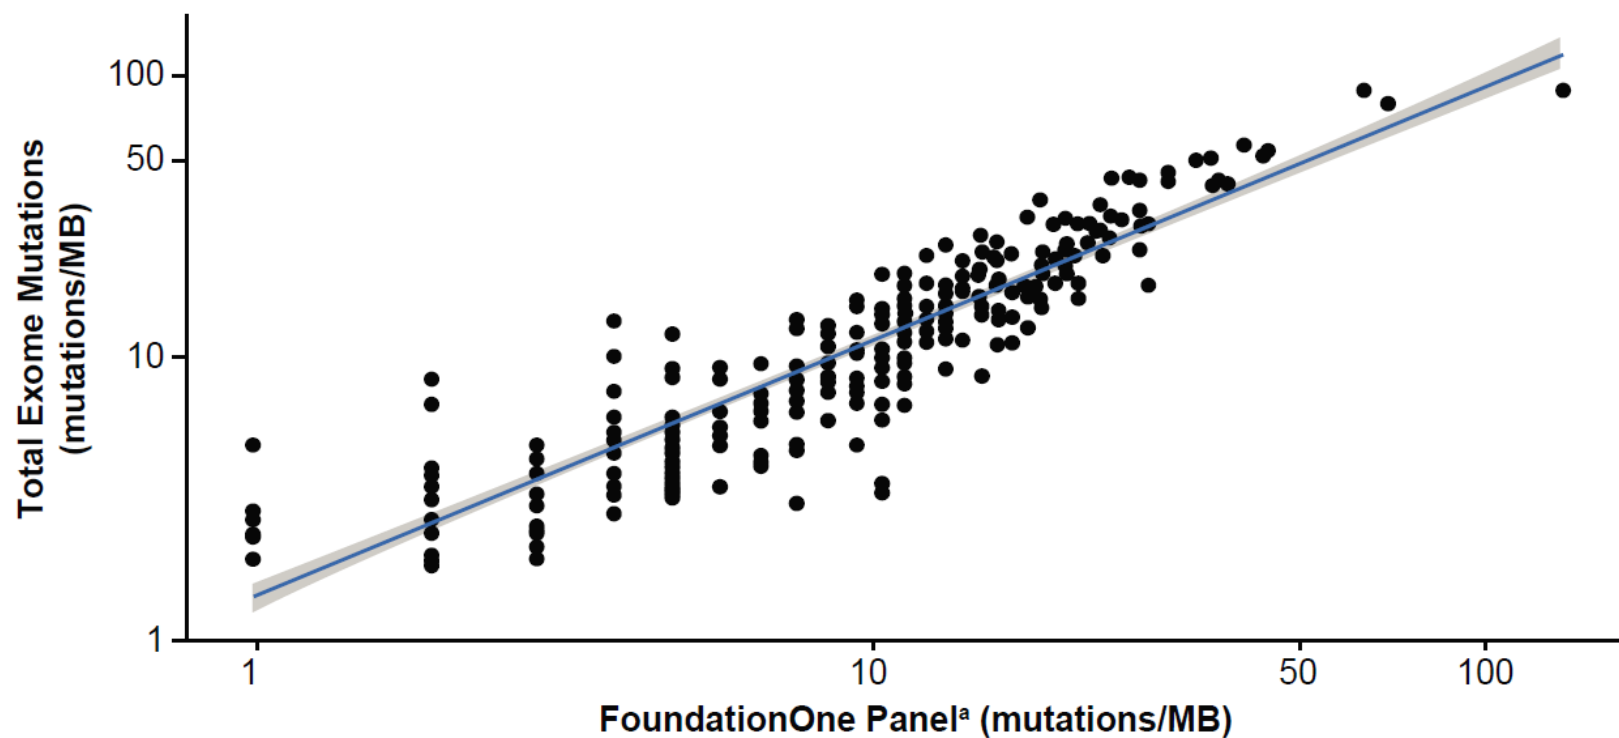

<sup>a</sup>Based on in silico analysis filtering on 315 genes in FoundationOne comprehensive genomic profile (Foundation Medicine, Inc, Cambridge, MA, USA)<sup>4</sup>

**Figure S6. Kaplan–Meier Plot of Progression-free Survival in Patients Evaluable for Tumor Mutation Burden.**

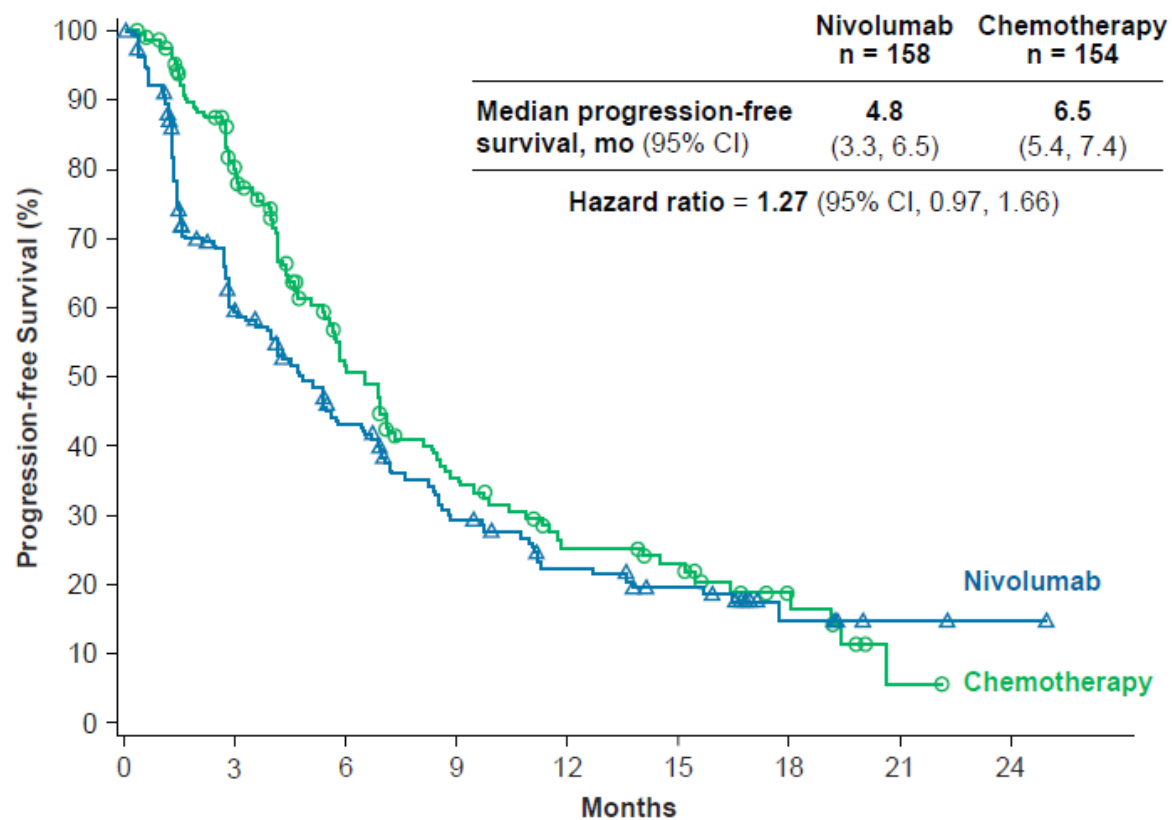

**No. at Risk by Time**

|              | 0   | 3   | 6  | 9  | 12 | 15 | 18 | 21 | 24 |
|--------------|-----|-----|----|----|----|----|----|----|----|
| Nivolumab    | 158 | 84  | 56 | 36 | 25 | 19 | 6  | 2  | 1  |
| Chemotherapy | 154 | 107 | 59 | 38 | 24 | 19 | 9  | 1  | 0  |

**Figure S7. Kaplan–Meier Plot of Overall Survival in Patients Evaluable for Tumor Mutation Burden.**

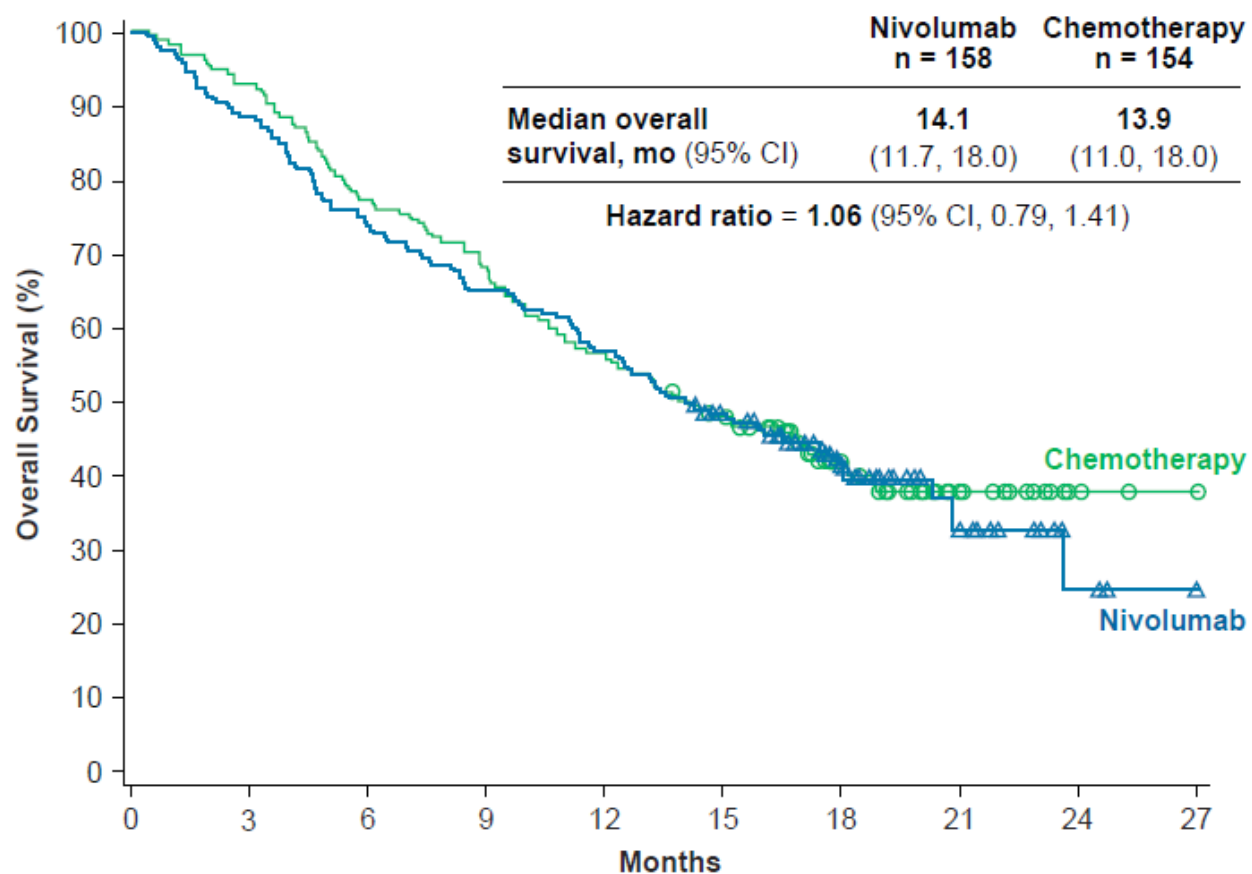

**No. at Risk by Time**

|                     | 0   | 3   | 6   | 9   | 12 | 15 | 18 | 21 | 24 | 27 |
|---------------------|-----|-----|-----|-----|----|----|----|----|----|----|
| <b>Nivolumab</b>    | 158 | 140 | 117 | 102 | 89 | 71 | 41 | 15 | 3  | 0  |
| <b>Chemotherapy</b> | 154 | 143 | 119 | 105 | 86 | 72 | 40 | 15 | 3  | 1  |

**Figure S8. Kaplan–Meier Plot Overall Survival in Evaluable Patients with High Tumor Mutation Burden.**

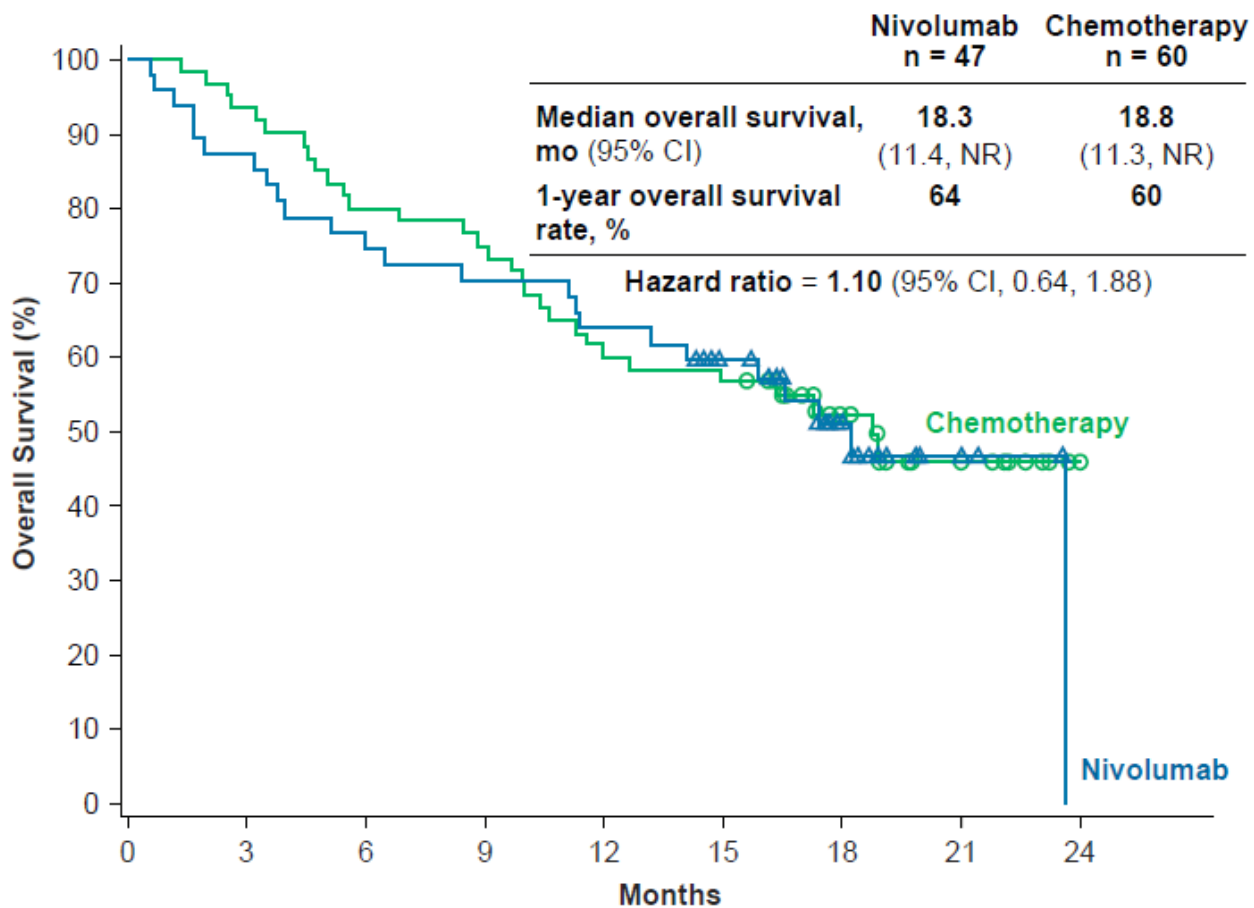

**No. at Risk by Time**

|              | 0  | 3  | 6  | 9  | 12 | 15 | 18 | 21 | 24 |
|--------------|----|----|----|----|----|----|----|----|----|
| Nivolumab    | 47 | 41 | 35 | 33 | 30 | 24 | 13 | 4  | 0  |
| Chemotherapy | 60 | 56 | 48 | 45 | 36 | 34 | 19 | 9  | 1  |

Figure S9. Kaplan–Meier Plot of Overall Survival in Evaluable Patients with Low or Medium Tumor Mutation Burden.

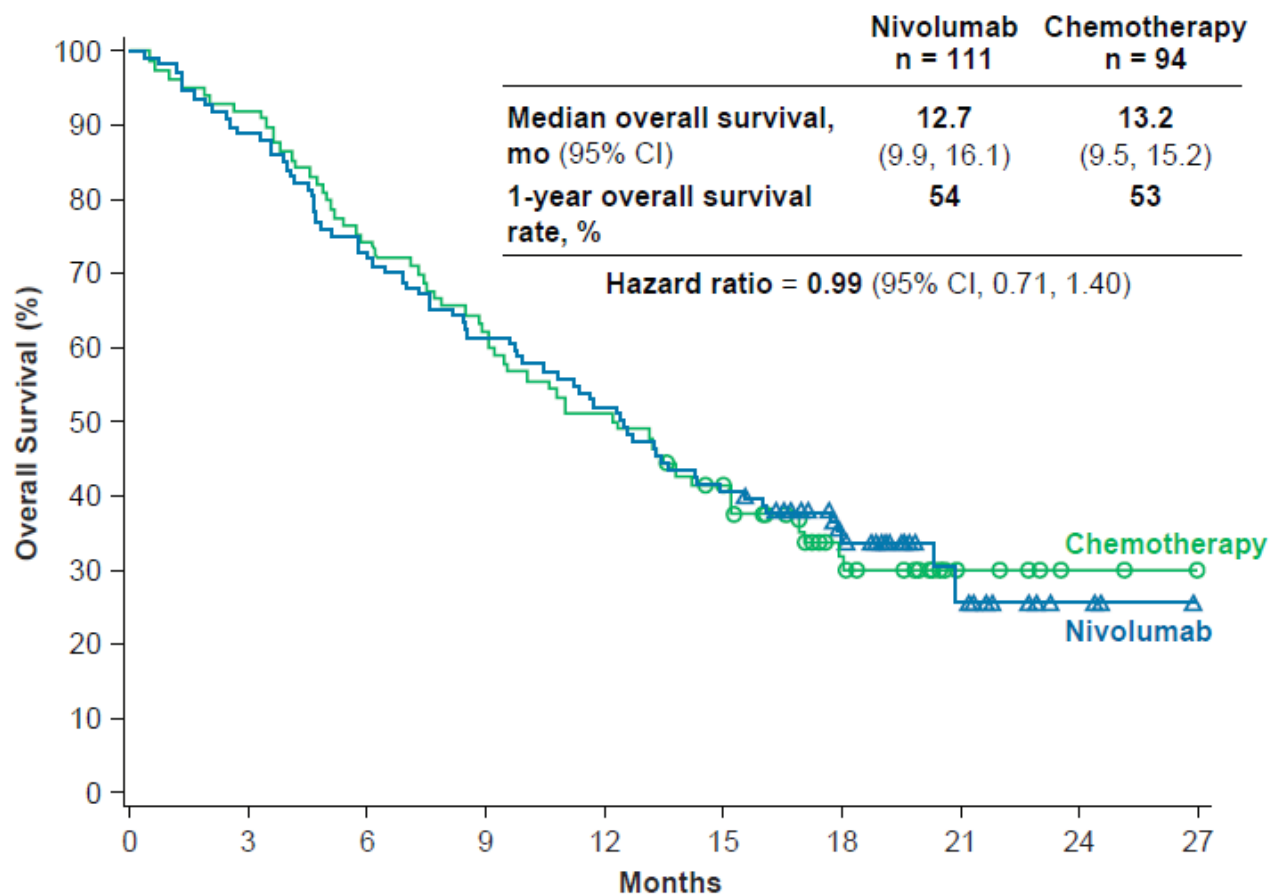

No. at Risk by Time

|              |     |    |    |    |    |    |    |    |   |   |
|--------------|-----|----|----|----|----|----|----|----|---|---|
| Nivolumab    | 111 | 99 | 82 | 69 | 59 | 47 | 28 | 11 | 3 | 0 |
| Chemotherapy | 94  | 87 | 71 | 60 | 50 | 38 | 21 | 6  | 2 | 1 |

**Figure S10. Kaplan–Meier Plot of Progression-free Survival by Tumor Mutation Burden (TMB) Tertile in the Nivolumab Arm.**

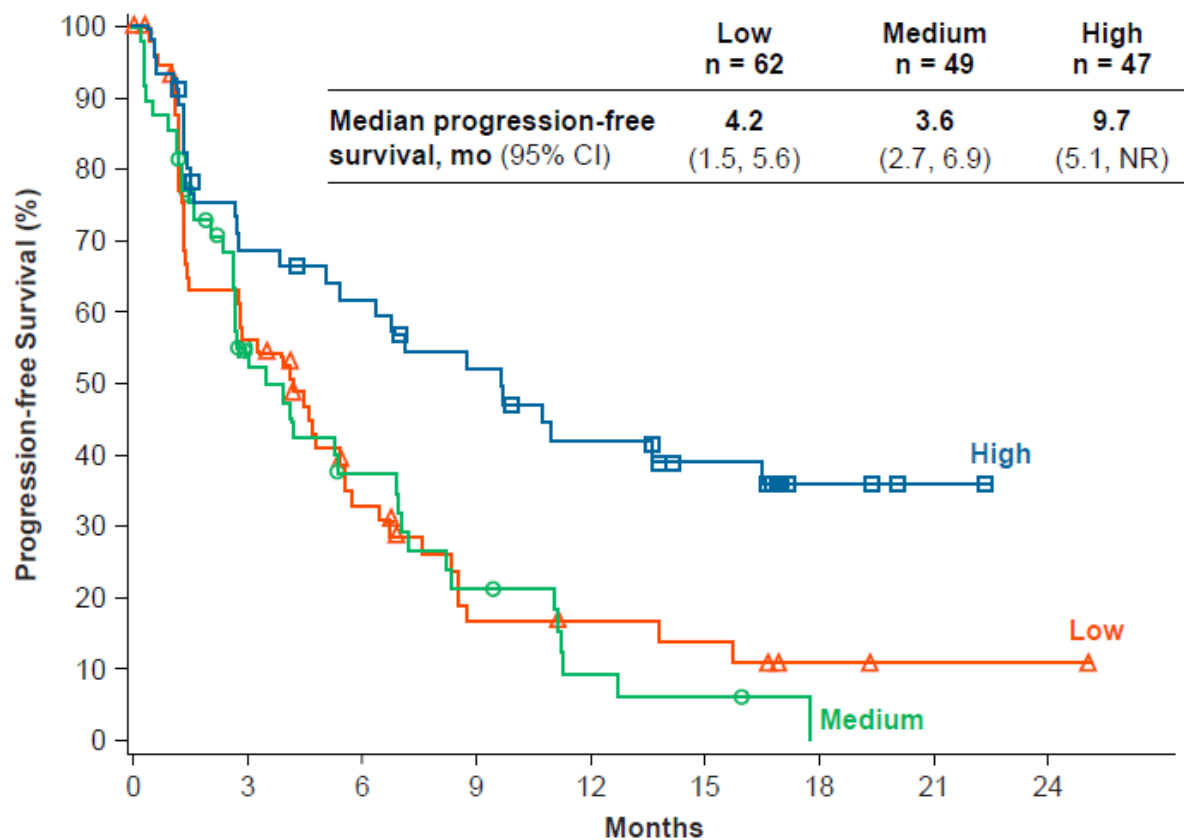

| TMB    | No. at Risk by Time |    |    |    |    |    |   |   |   |
|--------|---------------------|----|----|----|----|----|---|---|---|
| Low    | 62                  | 32 | 16 | 7  | 6  | 5  | 2 | 1 | 1 |
| Medium | 49                  | 22 | 14 | 8  | 3  | 2  | 0 | 0 | 0 |
| High   | 47                  | 30 | 26 | 21 | 16 | 12 | 4 | 1 | 0 |

**Figure S11. Kaplan–Meier Plot of Progression-free Survival by Tumor Mutation Burden (TMB) Tertile in the Chemotherapy Arm.**

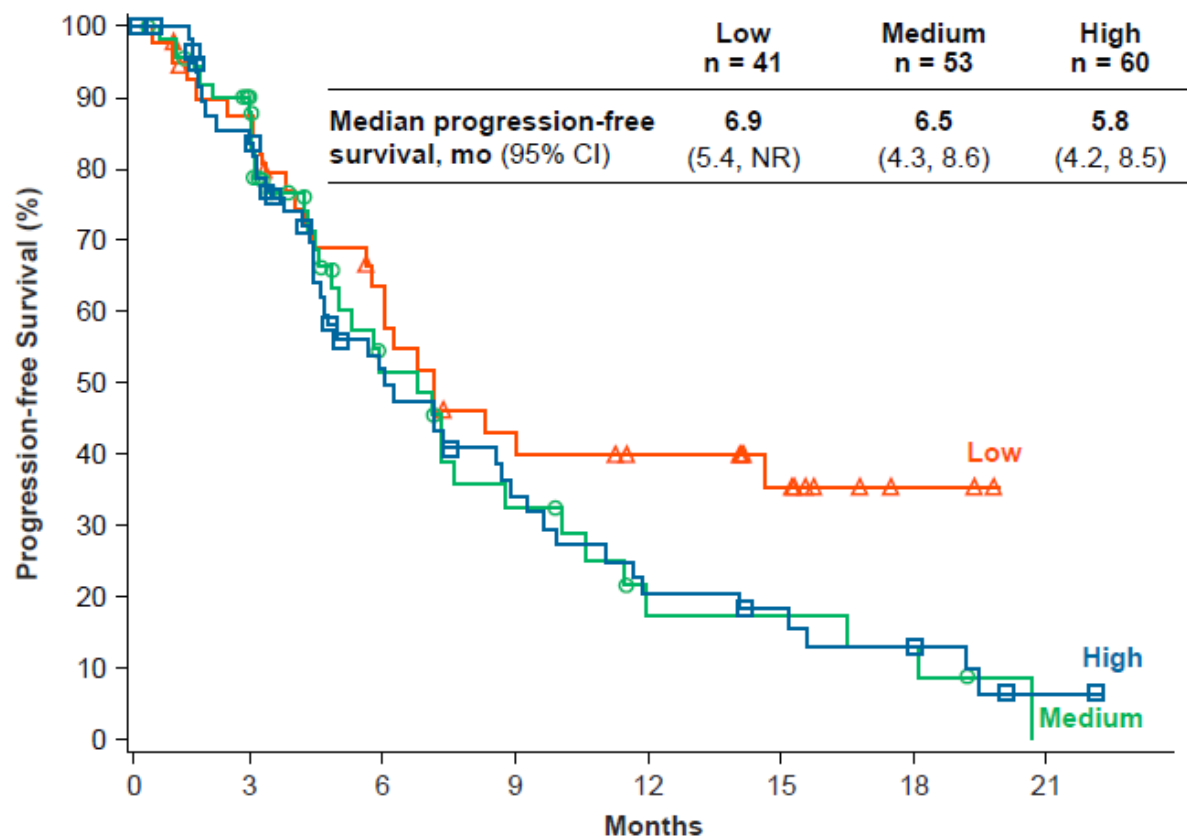

| TMB    | No. at Risk by Time |    |    |    |    |   |   |   |
|--------|---------------------|----|----|----|----|---|---|---|
| Low    | 41                  | 31 | 20 | 13 | 11 | 8 | 2 | 0 |
| Medium | 53                  | 34 | 17 | 10 | 4  | 4 | 3 | 0 |
| High   | 60                  | 42 | 22 | 15 | 9  | 7 | 4 | 1 |



Figure S12. Overall Response by Tumor Mutation Burden.

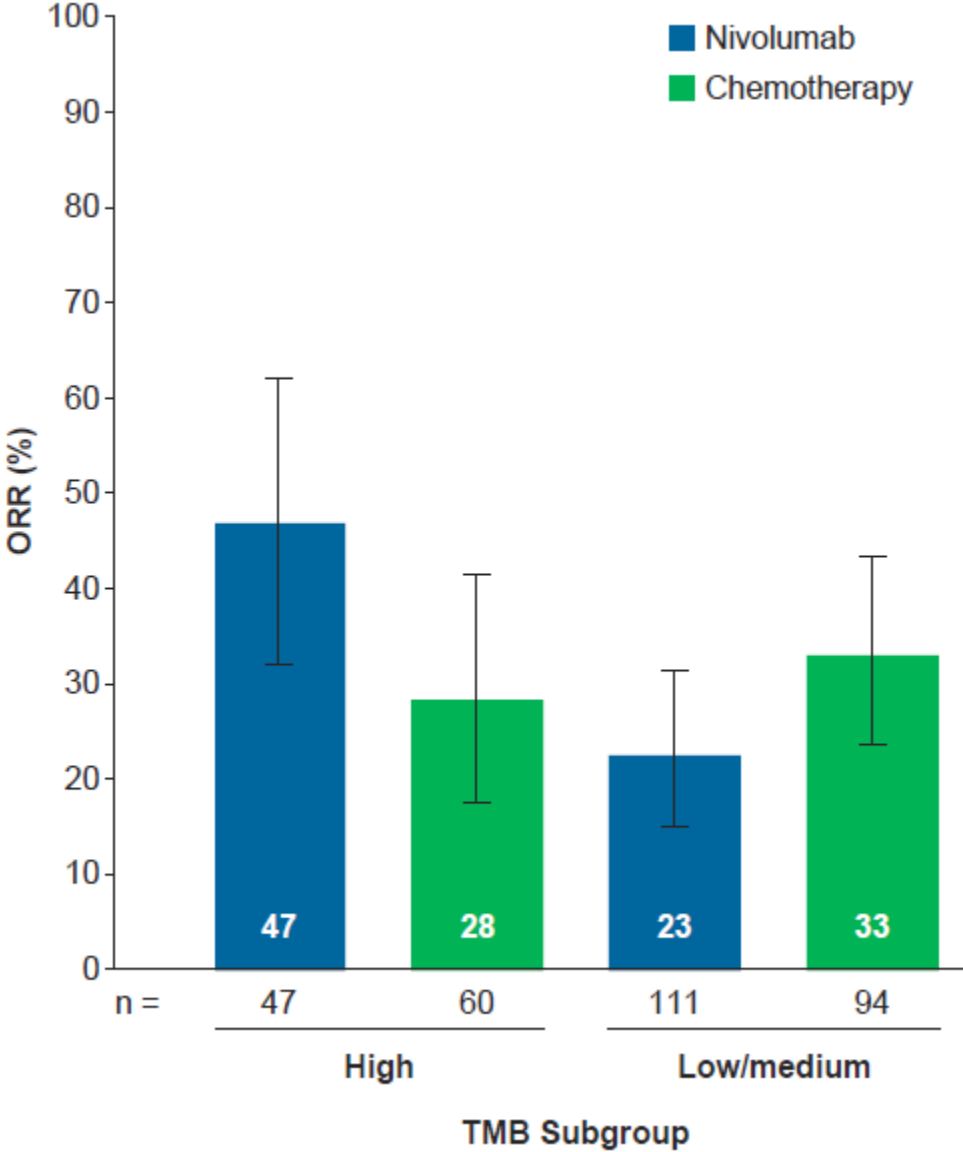

Figure S13. Analysis of the Association Between Tumor Mutation Burden and PD-L1 Expression<sup>a</sup> in Evaluable Patients.

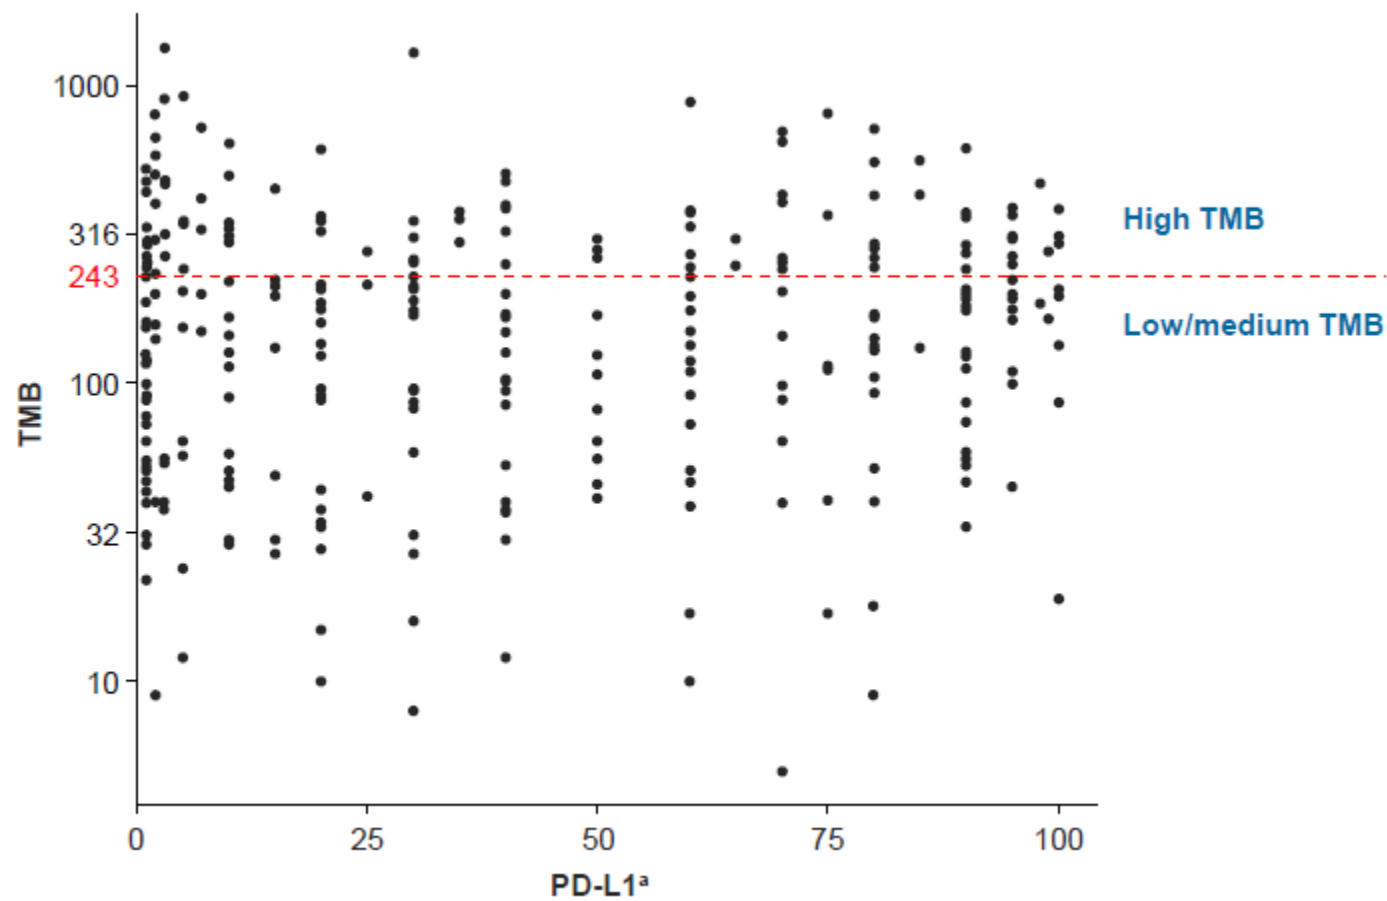

Pearson's correlation coefficient = 0.059

<sup>a</sup>All patients in Checkmate 026 had  $\geq 1\%$  PD-L1 tumor expression

**Figure S14. Overall Response by Tumor Mutation Burden and PD-L1 Expression.**

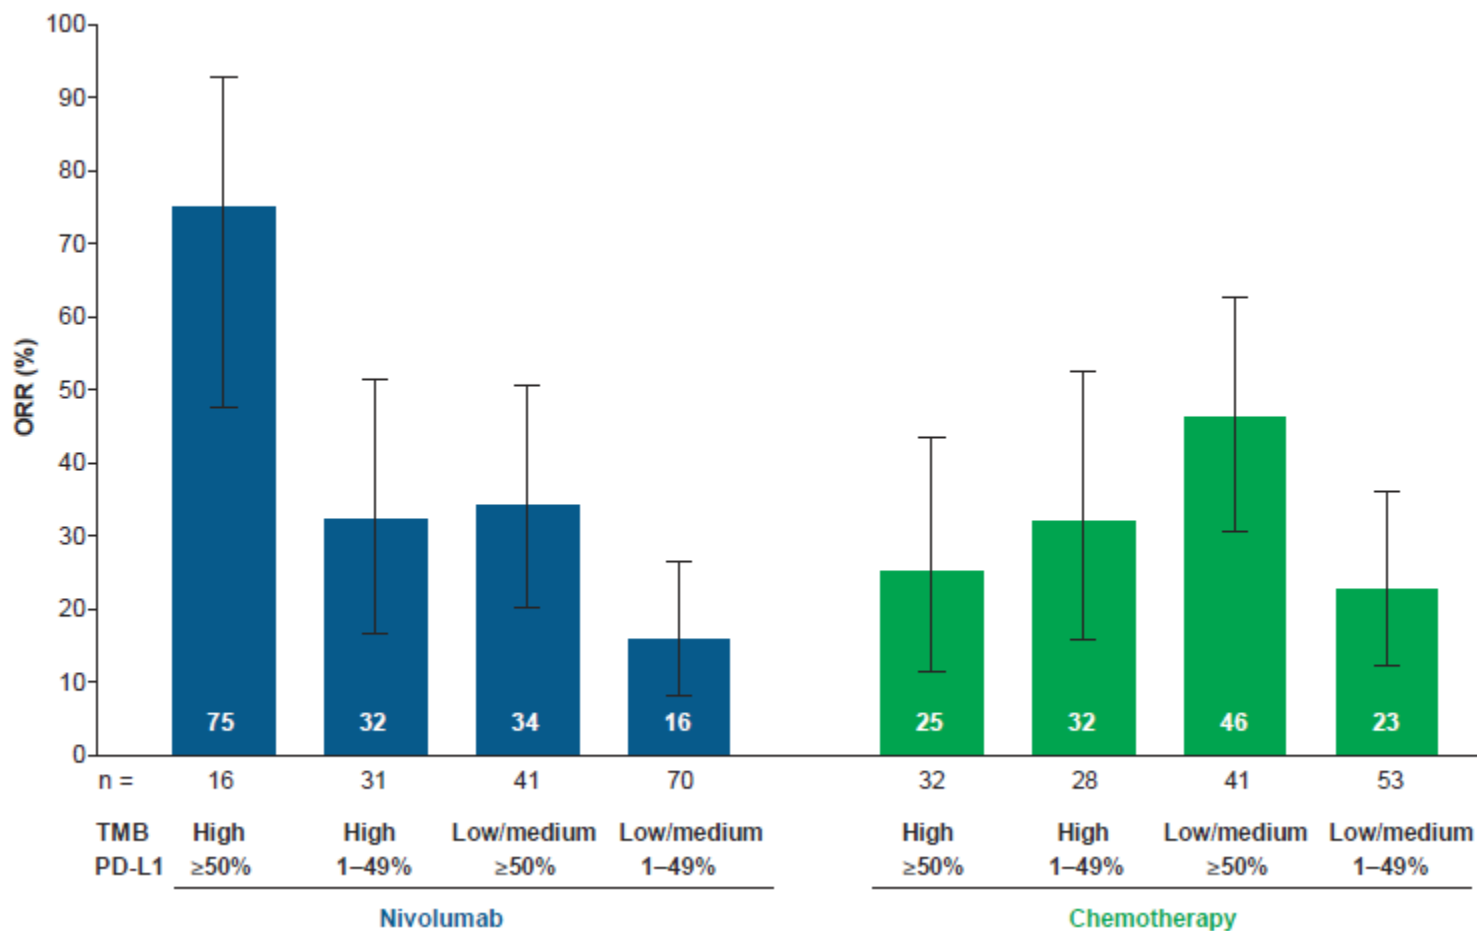

**Table S1. End-of-Treatment Summary (All Treated Patients).**

|                                                                 | <b>Nivolumab<br/>n = 267</b> | <b>Chemotherapy<br/>n = 263</b> |
|-----------------------------------------------------------------|------------------------------|---------------------------------|
| <b>Patients continuing in the treatment period, n (%)</b>       | 43 (16.1)                    | 12 (4.6)                        |
| <b>Patients not continuing in the treatment period, n (%)</b>   | 224 (83.9)                   | 251 (95.4)                      |
| <b>Reason for not continuing in the treatment period, n (%)</b> |                              |                                 |
| Disease progression                                             | 168 (62.9)                   | 142 (54.0)                      |
| Study drug toxicity                                             | 27 (10.1)                    | 30 (11.4)                       |
| Death                                                           | 1 (0.4)                      | 0                               |
| Adverse event unrelated to study drug                           | 20 (7.5)                     | 21 (8.0)                        |
| Patient request to discontinue study treatment                  | 5 (1.9)                      | 9 (3.4)                         |
| Patient withdrew consent                                        | 2 (0.7)                      | 1 (0.4)                         |
| Maximum clinical benefit                                        | 0                            | 18 (6.8)                        |
| Lack of compliance                                              | 1 (0.4)                      | 0                               |
| Other                                                           | 0                            | 1 (0.4)                         |
| Completed required treatment cycles                             | 0                            | 29 (11.0)                       |

**Table S2. Baseline Characteristics of All Randomized Patients.**

| <b>Characteristic</b>                       | <b>Nivolumab<br/>(n = 271)</b> | <b>Chemotherapy<br/>(n = 270)</b> | <b>Total<br/>(N = 541)</b> |
|---------------------------------------------|--------------------------------|-----------------------------------|----------------------------|
| <b>Age, year</b>                            |                                |                                   |                            |
| Median                                      | 63                             | 65                                | 64                         |
| Range                                       | 32–89                          | 29–87                             | 29–89                      |
| <b>Age category, n (%)</b>                  |                                |                                   |                            |
| <65 years                                   | 148 (54.6)                     | 133 (49.3)                        | 281 (51.9)                 |
| ≥65 to <75 years                            | 93 (34.3)                      | 105 (38.9)                        | 198 (36.6)                 |
| ≥75 years                                   | 30 (11.1)                      | 32 (11.9)                         | 62 (11.5)                  |
| <b>Sex, n (%)</b>                           |                                |                                   |                            |
| Male                                        | 184 (67.9)                     | 148 (54.8)                        | 332 (61.4)                 |
| Female                                      | 87 (32.1)                      | 122 (45.2)                        | 209 (38.6)                 |
| <b>Race, n (%)</b>                          |                                |                                   |                            |
| White                                       | 228 (84.1)                     | 242 (89.6)                        | 470 (86.9)                 |
| Black                                       | 6 (2.2)                        | 10 (3.7)                          | 16 (3.0)                   |
| Asian                                       | 30 (11.1)                      | 17 (6.3)                          | 47 (8.7)                   |
| American Indian or Alaska native            | 1 (0.4)                        | 0                                 | 1 (0.2)                    |
| Other                                       | 6 (2.2)                        | 1 (0.4)                           | 7 (1.3)                    |
| <b>Disease stage, n (%)</b>                 |                                |                                   |                            |
| Stage IV                                    | 255 (94.1)                     | 244 (90.4)                        | 499 (92.2)                 |
| Recurrent                                   | 16 (5.9)                       | 25 (9.3)                          | 41 (7.6)                   |
| Not reported                                | 0                              | 1 (0.4)                           | 1 (0.2)                    |
| <b>ECOG performance-status score, n (%)</b> |                                |                                   |                            |
| 0                                           | 85 (31.4)                      | 93 (34.4)                         | 178 (32.9)                 |
| 1                                           | 183 (67.5)                     | 174 (64.4)                        | 357 (66.0)                 |
| ≥2                                          | 2 (0.7)                        | 3 (1.1)                           | 5 (0.9)                    |
| Not reported                                | 1 (0.4)                        | 0                                 | 1 (0.2)                    |
| <b>Smoking status, n (%)</b>                |                                |                                   |                            |
| Never smoker                                | 30 (11.1)                      | 29 (10.7)                         | 59 (10.9)                  |

|                                                   |               |               |               |
|---------------------------------------------------|---------------|---------------|---------------|
| Former smoker                                     | 186 (68.6)    | 182 (67.4)    | 368 (68.0)    |
| Current smoker                                    | 52 (19.2)     | 55 (20.4)     | 107 (19.8)    |
| Unknown                                           | 3 (1.1)       | 4 (1.5)       | 7 (1.3)       |
| Prior systemic therapy, n (%)                     |               |               |               |
| Adjuvant                                          | 22 (8.1)      | 25 (9.3)      | 47 (8.7)      |
| Neoadjuvant                                       | 5 (1.8)       | 4 (1.5)       | 9 (1.7)       |
| Prior radiotherapy, n (%)                         | 102 (37.6)    | 107 (39.6)    | 209 (38.6)    |
| Tumor histology, n (%)                            |               |               |               |
| Squamous cell carcinoma                           | 66 (24.4)     | 64 (23.7)     | 130 (24.0)    |
| Nonsquamous cell carcinoma                        | 205 (75.6)    | 206 (76.3)    | 411 (76.0)    |
| Selected sites of metastatic lesions, n (%)       |               |               |               |
| Brain                                             | 33 (12.2)     | 36 (13.3)     | 69 (12.8)     |
| Liver                                             | 54 (19.9)     | 36 (13.3)     | 90 (16.6)     |
| Median sum of target lesion diameters, mm (range) | 82.5 (14–218) | 68.0 (15–272) | 76.0 (14–272) |
| PD-L1 expression level, n (%)                     |               |               |               |
| ≥5%                                               | 208 (76.8)    | 210 (77.8)    | 418 (77.3)    |
| ≥25%                                              | 132 (48.7)    | 164 (60.7)    | 296 (54.7)    |
| ≥50%                                              | 88 (32.5)     | 126 (46.7)    | 214 (39.6)    |
| ≥75%                                              | 56 (20.7)     | 74 (27.4)     | 130 (24.0)    |

*ECOG* = Eastern Cooperative Oncology Group.

**Table S3. Baseline Characteristics of Patients with  $\geq 5\%$  PD-L1 Expression.**

| <b>Characteristic</b>                       | <b>Nivolumab<br/>(n = 211)</b> | <b>Chemotherapy<br/>(n = 212)</b> | <b>Total<br/>(N = 423)</b> |
|---------------------------------------------|--------------------------------|-----------------------------------|----------------------------|
| <b>Age, year</b>                            |                                |                                   |                            |
| Median                                      | 63                             | 64                                | 64                         |
| Range                                       | 32–89                          | 29–87                             | 29–89                      |
| <b>Age category, n (%)</b>                  |                                |                                   |                            |
| <65 years                                   | 119 (56.4)                     | 108 (50.9)                        | 227 (53.7)                 |
| $\geq 65$ to <75 years                      | 66 (31.3)                      | 78 (36.8)                         | 144 (34.0)                 |
| $\geq 75$ years                             | 26 (12.3)                      | 26 (12.3)                         | 52 (12.3)                  |
| <b>Sex, n (%)</b>                           |                                |                                   |                            |
| Male                                        | 143 (67.8)                     | 118 (55.7)                        | 261 (61.7)                 |
| Female                                      | 68 (32.2)                      | 94 (44.3)                         | 162 (38.3)                 |
| <b>Race, n (%)</b>                          |                                |                                   |                            |
| White                                       | 177 (83.9)                     | 186 (87.7)                        | 363 (85.8)                 |
| Black                                       | 5 (2.4)                        | 8 (3.8)                           | 13 (3.1)                   |
| Asian                                       | 25 (11.8)                      | 17 (8.0)                          | 42 (9.9)                   |
| American Indian or Alaska native            | 1 (0.5)                        | 0                                 | 1 (0.2)                    |
| Other                                       | 3 (1.4)                        | 1 (0.5)                           | 4 (0.9)                    |
| <b>Disease stage, n (%)</b>                 |                                |                                   |                            |
| Stage IV                                    | 198 (93.8)                     | 191 (90.1)                        | 389 (92.0)                 |
| Recurrent                                   | 13 (6.2)                       | 20 (9.4)                          | 33 (7.8)                   |
| Not reported                                | 0                              | 1 (0.5)                           | 1 (0.2)                    |
| <b>ECOG performance-status score, n (%)</b> |                                |                                   |                            |
| 0                                           | 66 (31.3)                      | 77 (36.3)                         | 143 (33.8)                 |
| 1                                           | 142 (67.3)                     | 132 (62.3)                        | 274 (64.8)                 |
| $\geq 2$                                    | 2 (0.9)                        | 3 (1.4)                           | 5 (1.2)                    |
| Not reported                                | 1 (0.5)                        | 0                                 | 1 (0.2)                    |
| <b>Smoking status, n (%)</b>                |                                |                                   |                            |
| Never smoker                                | 22 (10.4)                      | 24 (11.3)                         | 46 (10.9)                  |

|                                                   |               |               |               |
|---------------------------------------------------|---------------|---------------|---------------|
| Former smoker                                     | 145 (68.7)    | 145 (68.4)    | 290 (68.6)    |
| Current smoker                                    | 42 (19.9)     | 39 (18.4)     | 81 (19.1)     |
| Unknown                                           | 2 (0.9)       | 4 (1.9)       | 6 (1.4)       |
| Prior systemic therapy, n (%)                     |               |               |               |
| Adjuvant                                          | 17 (8.1)      | 19 (9.0)      | 36 (8.5)      |
| Neoadjuvant                                       | 2 (0.9)       | 3 (1.4)       | 5 (1.2)       |
| Prior radiotherapy, n (%)                         | 79 (37.4)     | 84 (39.6)     | 163 (38.5)    |
| Tumor histology, n (%)                            |               |               |               |
| Squamous cell carcinoma                           | 48 (22.7)     | 48 (22.6)     | 96 (22.7)     |
| Nonsquamous cell carcinoma                        | 163 (77.3)    | 164 (77.4)    | 327 (77.3)    |
| Selected sites of metastatic lesions, n (%)       |               |               |               |
| Brain                                             | 28 (13.3)     | 26 (12.3)     | 54 (12.8)     |
| Liver                                             | 41(19.4)      | 26 (12.3)     | 67 (15.8)     |
| Median sum of target lesion diameters, mm (range) | 83.0 (14–215) | 70.0 (15–272) | 79.0 (14–272) |
| PD-L1 expression level, n (%)                     |               |               |               |
| ≥25%                                              | 132 (62.6)    | 164 (77.4)    | 296 (70.0)    |
| ≥50%                                              | 88 (41.7)     | 126 (59.4)    | 214 (50.6)    |
| ≥75%                                              | 56 (26.5)     | 74 (34.9)     | 130 (30.7)    |



**Table S4. Chemotherapy Study Treatments (All Treated Patients).**

| <b>Study treatments, n (%)</b>       | <b>Chemotherapy<br/>n = 263</b> |
|--------------------------------------|---------------------------------|
| Pemetrexed/carboplatin               | 115 (43.7)                      |
| Pemetrexed/cisplatin                 | 86 (32.7)                       |
| Gemcitabine/carboplatin              | 33 (12.5)                       |
| Gemcitabine/cisplatin                | 13 (4.9)                        |
| Paclitaxel/carboplatin               | 16 (6.1)                        |
| <b>Maintenance pemetrexed, n (%)</b> | 100 (38.0)                      |

**Table S5. Subsequent Systemic Therapy in Patients with  $\geq 5\%$  PD-L1 Expression.**

|                                                                     | <b>Nivolumab<br/>n = 211</b> | <b>Chemotherapy<br/>n = 212</b> |
|---------------------------------------------------------------------|------------------------------|---------------------------------|
| <b>Subsequent systemic therapy<sup>a</sup>, n (%)</b>               | 92 (43.6)                    | 136 (64.2)                      |
| <b>Immunotherapy, n (%)</b>                                         | 3 (1.4)                      | 128 (60.4)                      |
| Crossover nivolumab                                                 | 0                            | 122 (57.5)                      |
| Post-study nivolumab                                                | 2 (0.9)                      | 7 (3.3)                         |
| Ipilimumab                                                          | 1 (0.5)                      | 0                               |
| <b>ALK/EGFR tyrosine kinase<br/>inhibitors, n (%)</b>               | 12 (5.7)                     | 6 (2.8)                         |
| <b>Experimental therapy, n (%)</b>                                  | 2 (0.9)                      | 2 (0.9)                         |
| <b>Chemotherapy and other systemic<br/>anticancer agents, n (%)</b> | 88 (41.7)                    | 30 (14.2)                       |

*ALK* = anaplastic lymphoma kinase; *EGFR* = epidermal growth factor receptor; *PD-L1* = programmed death-1 ligand 1.

<sup>a</sup>Patients may have received more than one type of subsequent therapy

**Table S6. Sample Attrition During Tumor Mutation Burden Determination.**

| <b>Patients, n (%)</b>                                               | <b>Tumor DNA</b> | <b>Germline DNA<sup>a</sup></b> |
|----------------------------------------------------------------------|------------------|---------------------------------|
| Randomized                                                           | 541 (100)        | 541 (100)                       |
| Samples available for DNA extraction <sup>b</sup>                    | 485 (90)         | 452 (84)                        |
| DNA available for sequencing                                         | 408 (75)         | 452 (84)                        |
| Successful preparation of next-generation sequencing library         | 402 (74)         | 452 (84)                        |
| Passed internal quality control <sup>c</sup>                         | 320 (59)         | 432 (80)                        |
| Matched tumor-germline exome sequences for TMB analysis <sup>d</sup> | 312 (58)         |                                 |

<sup>a</sup>Matched germline DNA from whole blood was used to distinguish germline single-nucleotide polymorphisms from somatic missense mutations in the tumor DNA

<sup>b</sup>Samples were not available for various reasons, including but not limited to lack of patient pharmacogenetic consent, samples exhausted for PD-L1 testing, or poor tissue sampling

<sup>c</sup>Internal quality control included evaluation of factors including but not limited to discordance between tumor and germline DNA, too few sequence reads, and low or uneven target region coverage

<sup>d</sup>Eight patients with available tumor DNA sequences did not have matched germline DNA sequences

**Table S7. Baseline Characteristics of All Randomized Patients and Patients with Evaluable Tumor Mutation Data.**

| <b>Characteristic</b>                | <b>All randomized patients<br/>(n = 541)</b> | <b>Patients with evaluable<br/>TMB data<br/>(n = 312)</b> |
|--------------------------------------|----------------------------------------------|-----------------------------------------------------------|
| Age, year                            |                                              |                                                           |
| Median                               | 64                                           | 65                                                        |
| Range                                | 29–89                                        | 32–89                                                     |
| Sex, n (%)                           |                                              |                                                           |
| Male                                 | 332 (61.4)                                   | 187 (59.9)                                                |
| Female                               | 209 (38.6)                                   | 125 (40.1)                                                |
| Disease stage, n (%)                 |                                              |                                                           |
| Stage IV                             | 499 (92.2)                                   | 291 (93.3)                                                |
| Recurrent                            | 41 (7.6)                                     | 20 (6.4)                                                  |
| Not reported                         | 1 (0.2)                                      | 1 (0.3)                                                   |
| ECOG performance-status score, n (%) |                                              |                                                           |
| 0                                    | 178 (32.9)                                   | 100 (32.1)                                                |
| 1                                    | 357 (66.0)                                   | 208 (66.7)                                                |
| ≥2                                   | 5 (0.9)                                      | 3 (1.0)                                                   |
| Not reported                         | 1 (0.2)                                      | 1 (0.3)                                                   |
| Smoking status, n (%)                |                                              |                                                           |
| Never smoker                         | 59 (10.9)                                    | 29 (9.3)                                                  |
| Former smoker                        | 368 (68.0)                                   | 223 (71.5)                                                |
| Current smoker                       | 107 (19.8)                                   | 56 (17.9)                                                 |
| Unknown                              | 7 (1.3)                                      | 4 (1.3)                                                   |
| Tumor histology, n (%)               |                                              |                                                           |
| Squamous cell carcinoma              | 130 (24.0)                                   | 71 (22.8)                                                 |
| Nonsquamous cell carcinoma           | 411 (76.0)                                   | 241 (77.2)                                                |
| PD-L1 expression level, n (%)        |                                              |                                                           |

|      |            |            |
|------|------------|------------|
| ≥5%  | 418 (77.3) | 252 (80.8) |
| ≥25% | 296 (54.7) | 185 (59.3) |
| ≥50% | 214 (39.6) | 130 (41.7) |

*ECOG* = Eastern Cooperative Oncology Group; *PD-L1* = programmed death-1 ligand 1.

**Table S8. Baseline Characteristics of Patients with Evaluable Tumor Mutation Data by Treatment Arm.**

| <b>Characteristic</b>                | <b>Nivolumab<br/>(n = 158)</b> | <b>Chemotherapy<br/>(n = 154)</b> |
|--------------------------------------|--------------------------------|-----------------------------------|
| Age, year                            |                                |                                   |
| Median                               | 65                             | 64                                |
| Range                                | 32–89                          | 34–87                             |
| Age category, n (%)                  |                                |                                   |
| <65 years                            | 76 (48.1)                      | 78 (50.6)                         |
| ≥65 to <75 years                     | 59 (37.3)                      | 57 (37.0)                         |
| ≥75 years                            | 23 (14.6)                      | 19 (12.3)                         |
| Sex, n (%)                           |                                |                                   |
| Male                                 | 105 (66.5)                     | 82 (53.2)                         |
| Female                               | 53 (33.5)                      | 72 (46.8)                         |
| Race, n (%)                          |                                |                                   |
| White                                | 126 (79.7)                     | 135 (87.7)                        |
| Black                                | 4 (2.5)                        | 6 (3.9)                           |
| Asian                                | 22 (13.9)                      | 12 (7.8)                          |
| American Indian or Alaska native     | 1 (0.6)                        | 0                                 |
| Other                                | 5 (3.2)                        | 1 (0.6)                           |
| Disease stage, n (%)                 |                                |                                   |
| Stage IV                             | 150 (94.9)                     | 141 (91.6)                        |
| Recurrent                            | 8 (5.1)                        | 12 (7.8)                          |
| Not reported                         | 0                              | 1 (0.6)                           |
| ECOG performance-status score, n (%) |                                |                                   |
| 0                                    | 46 (29.1)                      | 54 (35.1)                         |
| 1                                    | 110 (69.6)                     | 98 (63.6)                         |
| ≥2                                   | 1 (0.6)                        | 2 (1.3)                           |
| Not reported                         | 1 (0.6)                        | 0                                 |
| Smoking status, n (%)                |                                |                                   |

|                                                   |               |             |
|---------------------------------------------------|---------------|-------------|
| Never smoker                                      | 16 (10.1)     | 13 (8.4)    |
| Former smoker                                     | 116 (73.4)    | 107 (69.5)  |
| Current smoker                                    | 24 (15.2)     | 32 (20.8)   |
| Unknown                                           | 2 (1.3)       | 2 (1.3)     |
| Prior systemic therapy, n (%)                     |               |             |
| Adjuvant                                          | 13 (8.2)      | 12 (7.8)    |
| Neoadjuvant                                       | 2 (1.3)       | 2 (1.3)     |
| Prior radiotherapy, n (%)                         |               |             |
| 51 (32.3)                                         |               | 60 (39.0)   |
| Tumor histology, n (%)                            |               |             |
| Squamous cell carcinoma                           | 36 (22.8)     | 35 (22.7)   |
| Nonsquamous cell carcinoma                        | 122 (77.2)    | 119 (77.3)  |
| Selected sites of metastatic lesions, n (%)       |               |             |
| Brain                                             | 18 (11.4)     | 21 (13.6)   |
| Liver                                             | 34 (21.5)     | 31 (20.1)   |
| Median sum of target lesion diameters, mm (range) | 79.5 (14–218) | 70 (15–272) |
| PD-L1 expression level, n (%)                     |               |             |
| ≥5%                                               | 125 (79.1)    | 127 (82.5)  |
| ≥25%                                              | 86 (54.4)     | 99 (64.3)   |
| ≥50%                                              | 57 (36.1)     | 73 (47.4)   |
| Tumor mutation burden, n (%)                      |               |             |
| Low                                               | 62 (39.2)     | 41 (26.6)   |
| Medium                                            | 49 (31.0)     | 53 (34.4)   |
| High                                              | 47 (29.7)     | 60 (39.0)   |

ECOG = Eastern Cooperative Oncology Group.

**Table S9. Treatment-Related Adverse Events in  $\geq 5\%$  of Patients Treated with Nivolumab or Chemotherapy.**

| Event, n (%)                         | Nivolumab<br>n = 267 |           | Chemotherapy<br>n = 263 |            |
|--------------------------------------|----------------------|-----------|-------------------------|------------|
|                                      | Any Grade            | Grade 3–4 | Any Grade               | Grade 3–4  |
| Any event                            | 190 (71.2)           | 47 (17.6) | 243 (92.4)              | 133 (50.6) |
| Fatigue                              | 56 (21.0)            | 3 (1.1)   | 93 (35.4)               | 14 (5.3)   |
| Diarrhea                             | 37 (13.9)            | 3 (1.1)   | 34 (12.9)               | 5 (1.9)    |
| Decreased appetite                   | 32 (12.0)            | 1 (0.4)   | 73 (27.8)               | 4 (1.5)    |
| Nausea                               | 31 (11.6)            | 1 (0.4)   | 127 (48.3)              | 5 (1.9)    |
| Rash                                 | 26 (9.7)             | 2 (0.7)   | 15 (5.7)                | 1 (0.4)    |
| Aspartate aminotransferase increased | 23 (8.6)             | 7 (2.6)   | 12 (4.6)                | 1 (0.4)    |
| Pruritus                             | 22 (8.2)             | 0         | 7 (2.7)                 | 1 (0.4)    |
| Alanine aminotransferase increased   | 19 (7.1)             | 7 (2.6)   | 14 (5.3)                | 2 (0.8)    |
| Hypothyroidism                       | 17 (6.4)             | 0         | 1 (0.4)                 | 0          |
| Vomiting                             | 15 (5.6)             | 0         | 60 (22.8)               | 5 (1.9)    |
| Pyrexia                              | 14 (5.2)             | 0         | 13 (4.9)                | 1 (0.4)    |
| Rash maculopapular                   | 14 (5.2)             | 1 (0.4)   | 4 (1.5)                 | 0          |
| Constipation                         | 9 (3.4)              | 0         | 29 (11.0)               | 0          |
| Anemia                               | 9 (3.4)              | 1 (0.4)   | 113 (43.0)              | 46 (17.5)  |
| Asthenia                             | 8 (3.0)              | 0         | 28 (10.6)               | 4 (1.5)    |
| Dysgeusia                            | 7 (2.6)              | 0         | 21 (8.0)                | 0          |
| Peripheral edema                     | 6 (2.2)              | 0         | 22 (8.4)                | 0          |
| Blood creatinine increased           | 5 (1.9)              | 1 (0.4)   | 16 (6.1)                | 0          |
| Stomatitis                           | 5 (1.9)              | 0         | 15 (5.7)                | 1 (0.4)    |



|                                  |         |         |           |           |
|----------------------------------|---------|---------|-----------|-----------|
| Hypomagnesemia                   | 4 (1.5) | 0       | 25 (9.1)  | 2 (0.8)   |
| Mucosal inflammation             | 4 (1.5) | 0       | 20 (7.6)  | 0         |
| Alopecia                         | 3 (1.1) | 0       | 23 (8.7)  | 0         |
| Thrombocytopenia                 | 2 (0.7) | 1 (0.4) | 38 (14.4) | 22 (8.4)  |
| Platelet count decreased         | 2 (0.7) | 0       | 33 (12.5) | 9 (3.4)   |
| White blood cell count decreased | 2 (0.7) | 0       | 26 (9.9)  | 9 (3.4)   |
| Neutrophil count decreased       | 1 (0.4) | 1 (0.4) | 36 (13.7) | 20 (7.6)  |
| Peripheral sensory neuropathy    | 1 (0.4) | 0       | 15 (5.7)  | 0         |
| Neutropenia                      | 0       | 0       | 48 (18.3) | 29 (11.0) |
| Leukopenia                       | 0       | 0       | 16 (6.1)  | 9 (3.4)   |

**Table S10. Treatment-Related Serious Adverse Events in  $\geq 2\%$  of Patients Treated with Nivolumab or Chemotherapy.**

| Event, n (%)                         | Nivolumab<br>n = 267 |           | Chemotherapy<br>n = 263 |           |
|--------------------------------------|----------------------|-----------|-------------------------|-----------|
|                                      | Any Grade            | Grade 3–4 | Any Grade               | Grade 3–4 |
| Any event                            | 46 (17.2)            | 35 (13.1) | 48 (18.3)               | 41 (15.6) |
| Pneumonitis                          | 7 (2.6)              | 4 (1.5)   | 0                       | 0         |
| Aspartate aminotransferase increased | 6 (2.2)              | 6 (2.2)   | 0                       | 0         |
| Anemia                               | 0                    | 0         | 13 (4.9)                | 10 (3.8)  |
| Febrile neutropenia                  | 0                    | 0         | 6 (2.3)                 | 6 (2.3)   |
| Thrombocytopenia                     | 0                    | 0         | 6 (2.3)                 | 6 (2.3)   |

**Table S11. Treatment-Related Adverse Events Leading to Discontinuation of Nivolumab.**

| Event, n (%)                         | Nivolumab<br>n = 267 |           |
|--------------------------------------|----------------------|-----------|
|                                      | Any Grade            | Grade 3–4 |
| Any event                            | 26 (9.7)             | 21 (7.9)  |
| Aspartate aminotransferase increased | 5 (1.9)              | 5 (1.9)   |
| Alanine aminotransferase increased   | 5 (1.9)              | 5 (1.9)   |
| Pneumonitis                          | 3 (1.1)              | 3 (1.1)   |
| Colitis                              | 2 (0.7)              | 2 (0.7)   |
| Transaminases increased              | 1 (0.4)              | 1 (0.4)   |
| Interstitial lung disease            | 1 (0.4)              | 1 (0.4)   |
| Autoimmune colitis                   | 1 (0.4)              | 0         |
| Diarrhea                             | 1 (0.4)              | 0         |
| Gastritis                            | 1 (0.4)              | 0         |
| Nausea                               | 1 (0.4)              | 1 (0.4)   |
| Rash                                 | 1 (0.4)              | 1 (0.4)   |
| Rash maculopapular                   | 1 (0.4)              | 1 (0.4)   |
| Rash papular                         | 1 (0.4)              | 1 (0.4)   |
| Stevens-Johnson syndrome             | 1 (0.4)              | 1 (0.4)   |
| Malaise                              | 1 (0.4)              | 0         |
| Multiple organ dysfunction           | 1 (0.4)              | 1 (0.4)   |
| Adrenal insufficiency                | 1 (0.4)              | 1 (0.4)   |
| Cholestasis                          | 1 (0.4)              | 1 (0.4)   |
| Hypersensitivity                     | 1 (0.4)              | 1 (0.4)   |
| Arthritis                            | 1 (0.4)              | 0         |
| Pericardial effusion malignant       | 1 (0.4)              | 1 (0.4)   |

|                |         |         |
|----------------|---------|---------|
| Aphasia        | 1 (0.4) | 1 (0.4) |
| Confused state | 1 (0.4) | 1 (0.4) |

**Table S12. Treatment-Related Adverse Events Leading to Discontinuation of Chemotherapy**

| Event, n (%)                          | Chemotherapy<br>n = 263 |           |
|---------------------------------------|-------------------------|-----------|
|                                       | Any Grade               | Grade 3–4 |
| Any event                             | 35 (13.3)               | 17 (6.5)  |
| Anemia                                | 5 (1.9)                 | 3 (1.1)   |
| Blood creatinine increased            | 5 (1.9)                 | 0         |
| Febrile neutropenia                   | 4 (1.5)                 | 4 (1.5)   |
| Neutropenia                           | 3 (1.1)                 | 1 (0.4)   |
| Fatigue                               | 3 (1.1)                 | 2 (0.8)   |
| General physical health deterioration | 2 (0.8)                 | 2 (0.8)   |
| Decreased appetite                    | 2 (0.8)                 | 1 (0.4)   |
| Asthenia                              | 2 (0.8)                 | 0         |
| Chronic kidney disease                | 2 (0.8)                 | 0         |
| Renal infarction                      | 1 (0.4)                 | 1 (0.4)   |
| Renal failure                         | 1 (0.4)                 | 0         |
| Renal function test abnormal          | 1 (0.4)                 | 0         |
| Thrombocytopenia                      | 1 (0.4)                 | 1 (0.4)   |
| Myocardial infarction                 | 1 (0.4)                 | 1 (0.4)   |
| Pneumonia                             | 1 (0.4)                 | 1 (0.4)   |
| Erysipelas                            | 1 (0.4)                 | 1 (0.4)   |
| Sepsis                                | 1 (0.4)                 | 1 (0.4)   |
| Bronchospasm                          | 1 (0.4)                 | 1 (0.4)   |
| Pneumonitis                           | 1 (0.4)                 | 0         |
| Gastrointestinal hemorrhage           | 1 (0.4)                 | 1 (0.4)   |

|                               |         |   |
|-------------------------------|---------|---|
| Nausea                        | 1 (0.4) | 0 |
| Vomiting                      | 1 (0.4) | 0 |
| Neurotoxicity                 | 1 (0.4) | 0 |
| Peripheral sensory neuropathy | 1 (0.4) | 0 |
| Tinnitus                      | 1 (0.4) | 0 |
| Peripheral edema              | 1 (0.4) | 0 |

**Table S13. Treatment-Related Select Adverse Events<sup>a</sup> in Patients Treated with Nivolumab or Chemotherapy.**

| Select Adverse Event Category, n (%) | Nivolumab<br>n = 267 |           | Chemotherapy<br>n = 263 |           |
|--------------------------------------|----------------------|-----------|-------------------------|-----------|
|                                      | Any Grade            | Grade 3–4 | Any Grade               | Grade 3–4 |
| Skin                                 | 63 (23.6)            | 5 (1.9)   | 25 (9.5)                | 1 (0.4)   |
| Gastrointestinal                     | 39 (14.6)            | 6 (2.2)   | 34 (12.9)               | 5 (1.9)   |
| Hepatic                              | 33 (12.4)            | 9 (3.4)   | 26 (9.9)                | 2 (0.8)   |
| Pulmonary                            | 14 (5.2)             | 6 (2.2)   | 1 (0.4)                 | 0         |
| Hypersensitivity/infusion reaction   | 11 (4.1)             | 1 (0.4)   | 3 (1.1)                 | 1 (0.4)   |
| Renal                                | 5 (1.9)              | 1 (0.4)   | 18 (6.8)                | 0         |

<sup>a</sup>Select adverse events are those with potential immunologic etiology that require frequent monitoring/intervention; includes events reported from the time of the first dose of study drug to 30 days after the last dose or to the time of the first dose of nivolumab crossover, whichever came first.

## References

1. Fisher S, Barry A, Abreu J, et al. A scalable, fully automated process for construction of sequence-ready human exome targeted capture libraries. *Genome Biol.* 2011;12(1):R1.  
<https://www.ncbi.nlm.nih.gov/pmc/articles/PMC3091298/>
2. Weber JA, Aldana R, Gallagher BD, Edwards JS. (2016) Sentieon DNA pipeline for variant detection - Software-only solution, over 20× faster than GATK 3.3 with identical results. *PeerJ PrePrints* 4:e1672v2 <https://doi.org/10.7287/peerj.preprints.1672v2>
3. Saunders CT, Wong WS, Swamy S, Becq J, Murray LJ, Cheetham RK. Strelka: accurate somatic small-variant calling from sequenced tumor-normal sample pairs. *Bioinformatics* 2012;28:1811-7.
4. Frampton GM, Fichtenholtz A, Otto GA, et al. Development and validation of a clinical cancer genomic profiling test based on massively parallel DNA sequencing. *Nat Biotechnol* 2013;31:1023–31.
